# The regulation of $\beta$ -catenin activity and function in cancer: therapeutic opportunities

Shuang Shang<sup>1,\*</sup>, Fang Hua<sup>1,\*</sup> and Zhuo-Wei Hu<sup>1</sup>

<sup>1</sup> Immunology and Cancer Pharmacology Group, State Key Laboratory of Bioactive Substance and Function of Natural Medicines, Institute of Materia Medica; Chinese Academy of Medical Sciences & Peking Union Medical College, Beijing, P.R. China

\* These authors have contributed equally to this work

Correspondence to: Zhuo-Wei Hu, email: huzhuowei@imm.ac.cn

Keywords: Wnt signaling, protein stability, subcellular localization, transcriptional regulation, cancer therapy

Received: December 20, 2016

Accepted: February 15, 2017

Published: February 25, 2017

Copyright: Shang et al. This is an open-access article distributed under the terms of the Creative Commons Attribution License (CC-BY), which permits unrestricted use, distribution, and reproduction in any medium, provided the original author and source are credited.

## ABSTRACT

**Wnt/ $\beta$ -catenin signaling is an evolutionarily conserved and versatile pathway that is known to be involved in embryonic development, tissue homeostasis and a wide variety of human diseases. Aberrant activation of this pathway gives rise to the accumulation of  $\beta$ -catenin in the nucleus and promotes the transcription of many oncogenes such as *c-Myc* and *CyclinD-1*. As a result, it contributes to carcinogenesis and tumor progression of several cancers, including colon cancer, hepatocellular carcinoma, pancreatic cancer, lung cancer and ovarian cancer.  $\beta$ -Catenin is a pivotal component of the Wnt signaling pathway and it is tightly regulated at three hierarchical levels: protein stability, subcellular localization and transcriptional activity. Uncovering the regulatory mechanisms of  $\beta$ -catenin will provide new insights into the pathogenesis of cancer and other diseases, as well as new therapeutic strategies against these diseases. In this review we dissect the concrete regulatory mechanisms of  $\beta$ -catenin from three aspects mentioned above. Then we focus on the role of  $\beta$ -catenin in cancer initiation, progression, dormancy, immunity and cancer stem cell maintenance. At last, we summarize the recent progress in the development of agents for the pharmacological modulation of  $\beta$ -catenin activity in cancer therapy.**

## INTRODUCTION

$\beta$ -Catenin is a multifunctional protein with a central role in physiological homeostasis. Its aberrant high expression leads to various diseases including cancer.  $\beta$ -Catenin is the mammalian homologue of the drosophila armadillo gene. It acts both as a transcriptional co-regulator and an adaptor protein for intracellular adhesion. Wnt is the chief regulator of  $\beta$ -catenin, which is a family of 19 glycoproteins to regulate both the  $\beta$ -catenin-dependent (canonical Wnt) and -independent (non-canonical Wnt) signaling pathways [1]. In canonical Wnt pathway, Dsh,  $\beta$ -catenin, Glycogen Synthase Kinase 3 beta (GSK3 $\beta$ ), adenomatous polyposis coli (APC), AXIN, and T-cell factor (TCF)/lymphoid enhancement factor (LEF) have been identified as signal transducers of the canonical Wnt pathway, in which  $\beta$ -catenin is a core molecule [2-5]. In the absence of Wnt ligands,  $\beta$ -catenin is kept at a low level

through the ubiquitin proteasome system (UPS).  $\beta$ -Catenin is recruited into a destruction complex that contains APC and AXIN, which facilitates the phosphorylation of  $\beta$ -catenin by casein kinase 1 (CK1) and then GSK3 $\beta$ . This leads to the ubiquitylation and proteasomal degradation of  $\beta$ -catenin. Upon Wnt activation or genetic mutations of Wnt components,  $\beta$ -catenin accumulates in the cytoplasm and then translocates into the nucleus. Consequently, it binds to LEF-1/TCF4 and some other co-regulators to promote the transcription of target genes such as *Jun*, *c-Myc* and *CyclinD-1* in a tissue specific manner, most of which encode oncoproteins. In more than half of all cancer cases, such as colorectal carcinoma, breast cancer, liver carcinoma, melanoma and leukemia,  $\beta$ -catenin accumulates within the nucleus or cytoplasm [6-10]. It helps to maintain the stemness of normal intestinal cells, furthermore, high-level cytoplasm expression and nuclear localization of  $\beta$ -catenin always induces tumorigenic traits

and promotes cancer cell proliferation and survival [11]. Besides,  $\beta$ -catenin promotes the progression of tumors via suppressing the T-cell responses [12]. The activity of  $\beta$ -catenin is controlled by a large number of binding partners that affect its stability, cellular localization and transcriptional activity. Understanding these regulatory mechanisms is of great importance for the identification of potential therapeutic targets to fight against Wnt/ $\beta$ -catenin-related cancers. This review focuses on the regulation of  $\beta$ -catenin activity in the canonical Wnt/ $\beta$ -catenin signaling pathway. We will provide an overview of the molecular mechanisms involved in the regulation of  $\beta$ -catenin signaling and the compelling therapeutic strategies aimed at targeting the Wnt/ $\beta$ -catenin pathway, which show promising anti-tumor activity.

## REGULATION OF $\beta$ -CATENIN STABILITY

The stabilization of  $\beta$ -catenin is critical in tumorigenesis, which is usually induced by aberrant Wnt activation and somatic gene mutations of  $\beta$ -catenin or destruction complex components [13, 14]. With inactivation of the  $\beta$ -catenin-destruction complex,  $\beta$ -catenin accumulates in the cytoplasm, and eventually translocates into the nucleus, where it binds with the TCF/LEF family members and induces the transcription of target genes. Indeed, nuclear accumulation of  $\beta$ -catenin can be observed in 80% of colorectal carcinoma [15]. The UPS-dependent degradation is considered to be the major mechanism for controlling the stability of  $\beta$ -catenin. However, it has been recently reported that  $\beta$ -catenin forms a complex with LC3 for an autophagy-dependent degradation [16].

## $\beta$ -Catenin and the ubiquitin-proteasome pathway

### The canonical destruction complex of $\beta$ -catenin

In the absence of Wnt,  $\beta$ -catenin is delivered to proteasome for degradation by the so-called cytoplasmic “destruction complex”, which is composed of APC, Axin (Axin-1, Axin-2), GSK3 $\beta$ , and casein kinase 1 $\alpha$  (CK1 $\alpha$ ) [17]. APC recruits  $\beta$ -catenin to the destruction complex [18]. After being phosphorylated by GSK3 $\beta$  or CK1, the phosphorylated APC recruits unphosphorylated  $\beta$ -catenin to the destruction complex. After being dephosphorylated by protein phosphatase 2A (PP2A), APC “hands”  $\beta$ -catenin to Axin to undergo phosphorylation and ubiquitination [19]. Axin functions as the core molecule of the complex that physically interacts simultaneously with  $\beta$ -catenin, APC and GSK3 $\beta$  [20]. GSK3 $\beta$  phosphorylates  $\beta$ -catenin at Ser33, Ser37 and Thr41 after the priming phosphorylation of  $\beta$ -catenin at Ser45 by CK1 $\alpha$ , and this exposes the phosphorylated  $\beta$ -catenin to E3 ligases [21, 22].  $\beta$ -Catenin or APC are considered as the “gatekeepers” of Wnt signaling, mutations of which usually occur

early during tumorigenesis [23, 24]. Frizzled is a family of G protein-coupled receptor proteins. Frizzled and low-density lipoprotein receptor-related proteins 5/6 (LRP5/6) act as Wnt receptors. The formation of the FZ and LRP5/6 heterodimer is an indispensable event in the activation of Wnt signaling [25, 26]. In the presence of Wnt, phosphorylated LRP5/6 provides a binding site for Axin and GSK3 $\beta$  through the PPPsPxS motifs, which disassembles the destruction complex and inhibits the degradation of  $\beta$ -catenin [27, 28].

### Phosphorylation and degradation of $\beta$ -catenin

A central question in Wnt-signaling transduction is the regulation of  $\beta$ -catenin phosphorylation, in which kinases and phosphatases jointly take part. Thus, a balance between phosphorylation and dephosphorylation must be reached. PP2A is a heterotrimeric complex, in which PR55 $\alpha$  (a regulatory subunit) suppresses the function of GSK3 $\beta$  by dephosphorylating  $\beta$ -catenin [29]. Phosphorylation of  $\beta$ -catenin is fine-tuned by direct phosphorylation of  $\beta$ -catenin itself or by modulating its kinases or phosphatases (Figure 1).

Destruction complex formation is a required step for  $\beta$ -catenin phosphorylation. LRP6, frequently rearranged in advanced T-cell 1 (FRAT1) and aldolase are proteins involved in the regulation of destruction complex formation. As a receptor of Wnt, LRP6 acts as an inhibitor of GSK3 $\beta$  in response to Wnt stimulation [30]. Upon activation by Wnt, LRP6 is phosphorylated, resulting in the recruitment of Axin1 to LRP6. As a result, phosphorylation of  $\beta$ -catenin by GSK3 $\beta$  is inhibited and  $\beta$ -catenin is stabilized [31]. FRAT1, a component of the Wnt/ $\beta$ -catenin signaling pathway, is positively correlated with tumor progression. FRAT1 is reported to prevent GSK3 $\beta$  from binding to the Axin1-APC-CK1 complex by competing with Axin1 for a common or closely overlapping binding site on GSK3 $\beta$  [32]. Aldolase has a similar function as FRAT1. Aldolase family members were recently reported to be prognostic markers of colorectal cancer progression. Through binding with GSK3 $\beta$ , aldolase disrupts the GSK3 $\beta$ -Axin interaction, leading to membrane translocation of Axin and activation of Wnt signaling [33].

Protein kinase C $\zeta$  (PKC $\zeta$ ) is another protein kinase that phosphorylates Wnt/ $\beta$ -catenin signaling through direct phosphorylation of  $\beta$ -catenin at Ser45 in a CK1 $\alpha$ -independent manner and promoting  $\beta$ -catenin degradation. This effect represses intestinal stem cell function and tumorigenesis [34]. Depletion of heat shock protein 105 (HSP105) a required component of the Wnt/ $\beta$ -catenin pathway, results in  $\beta$ -catenin accumulation and target gene transcription following Wnt stimulation. Mechanistically, HSP105 promotes the integration of PP2A into the  $\beta$ -catenin degradation complex, thus antagonizes the phosphorylation and degradation of  $\beta$ -catenin [35].

Some proteins indirectly regulate  $\beta$ -catenin phosphorylation and degradation through modulating

GSK3 $\beta$  kinase activity. Dachshund inactivates Wnt signaling and inhibits hepatocellular carcinoma (HCC) growth through decreasing GSK3 $\beta$  Ser9 phosphorylation [36]. The later effect maintains GSK3 $\beta$  kinase activity and promotes  $\beta$ -catenin degradation. RNA-binding motif on Y chromosome (RBMV) is overexpressed in male HCC tissues. RBMY induces Ser9 phosphorylation-induced inactivation of GSK3 $\beta$ , thereby impeding the GSK3 $\beta$ -mediated degradation of  $\beta$ -catenin and subsequently increasing stemness of HCC [37]. Besides RBMY, HBx-activated AKT and ERKs also phosphorylate and inactivate GSK3 $\beta$ , leading to stabilization of  $\beta$ -catenin

and *CyclinD1* gene transcription, and promoting the development of HCC [38].

### Ubiquitination and degradation of $\beta$ -catenin

The ubiquitination of  $\beta$ -catenin is a complex process, which is either phosphorylation dependent or independent. Also, this post-translational modification happens either in the cytoplasm or in the nucleus (Figure 2). Actually, phosphorylated  $\beta$ -catenin is recognized and ubiquitinated by specific E3 ubiquitin ligases, and undergoes degradation in the proteasome. The degradation of  $\beta$ -catenin could happen both in the cytoplasm and in the nucleus according

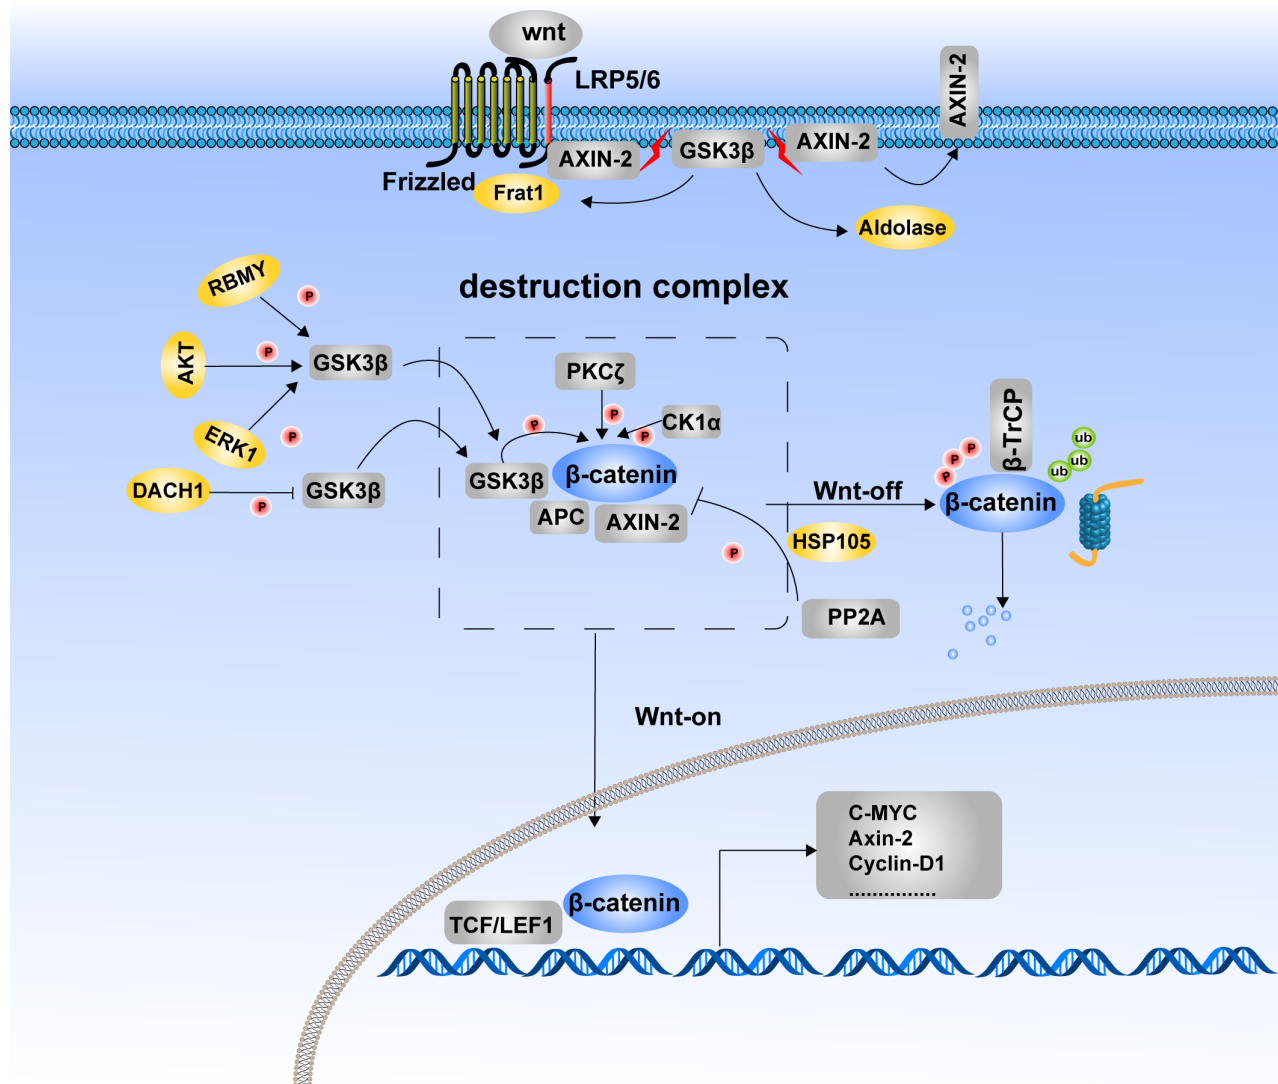

**Figure 1: Phosphorylation of  $\beta$ -catenin and its degradation.** The phosphorylated status of  $\beta$ -catenin is determined for its stability. Destruction complex formation is the requested step for  $\beta$ -catenin phosphorylation. In the Wnt-off state,  $\beta$ -catenin was recruited to the destruction complex and induced phosphorylation and subsequent degradation. In the Wnt-on state,  $\beta$ -catenin translocates into the nucleus due to the disassembly of the destruction complex. LRP5/6, FRAT1 and aldolase inhibit  $\beta$ -catenin degradation by suppressing assembly of the destruction complex, which provides a platform for  $\beta$ -catenin phosphorylation. Kinases and phosphatases jointly take part in the balance control of  $\beta$ -catenin between phosphorylation and dephosphorylation. GSK3 $\beta$ , CK1 $\alpha$  and PKC $\zeta$  are protein kinases that catalyze  $\beta$ -catenin phosphorylation and its subsequent degradation. PP2A is the phosphatase that induces dephosphorylation of  $\beta$ -catenin and inhibits its degradation. RBMY, AKT, ERK1, and DACT1 indirectly regulate the phosphorylation and degradation of  $\beta$ -catenin by modulating the Ser9 phosphorylation of GSK3 $\beta$  to inactivate its kinase activity.

to Wnt status. In the “Wnt-off” state,  $\beta$ -catenin is mainly degraded in the cytoplasm, whereas in the “Wnt-on” state,  $\beta$ -catenin is mainly degraded in the nucleus via the UPS. The corresponding E3 ubiquitin ligases are different at different subcellular locations. In the cytoplasm,  $\beta$ -TrCP, Jade1, casitas B-lineage lymphoma (c-Cbl) and the human homolog of drosophila seven in absentia (SIAH1) are E3 ligases that mediate  $\beta$ -catenin ubiquitination. Of these E3 ligases, only  $\beta$ -TrCP and Jade1 are Wnt responsive.  $\beta$ -TrCP interacts with the Cul1/Skp1 complex as well as  $\beta$ -catenin, thus to ubiquitinate  $\beta$ -catenin. In turn, Wnt/ $\beta$ -catenin signaling induces the expression and activity of  $\beta$ -TrCP ubiquitin ligase receptor and this negative feedback loop controls the  $\beta$ -catenin/TCF4 pathway [39].

Moreover, induction of the  $\beta$ -TrCP–GSK3 $\beta$  interaction is required for late-phase stabilization of  $\beta$ -catenin in canonical Wnt signaling. Jade1 is a candidate renal tumor suppressor that binds to the N-terminus of  $\beta$ -catenin in a Wnt-responsive fashion. Either phosphorylated or non-phosphorylated  $\beta$ -catenin can be ubiquitinated by Jade1.  $\beta$ -Catenin Ser33 phosphorylation induced by GSK3 $\beta$  enhances its binding with Jade1 in the Wnt-off state [40]. Thus different characteristics of  $\beta$ -TrCP and Jade1 ensure optimal cytoplasmic  $\beta$ -catenin regulation. Besides Jade1, SIAH1 induces ubiquitination of non-phosphorylated  $\beta$ -catenin too in response to the tumor suppressor p53 to promote  $\beta$ -catenin degradation [41].

In the Wnt-on state,  $\beta$ -catenin translocates into

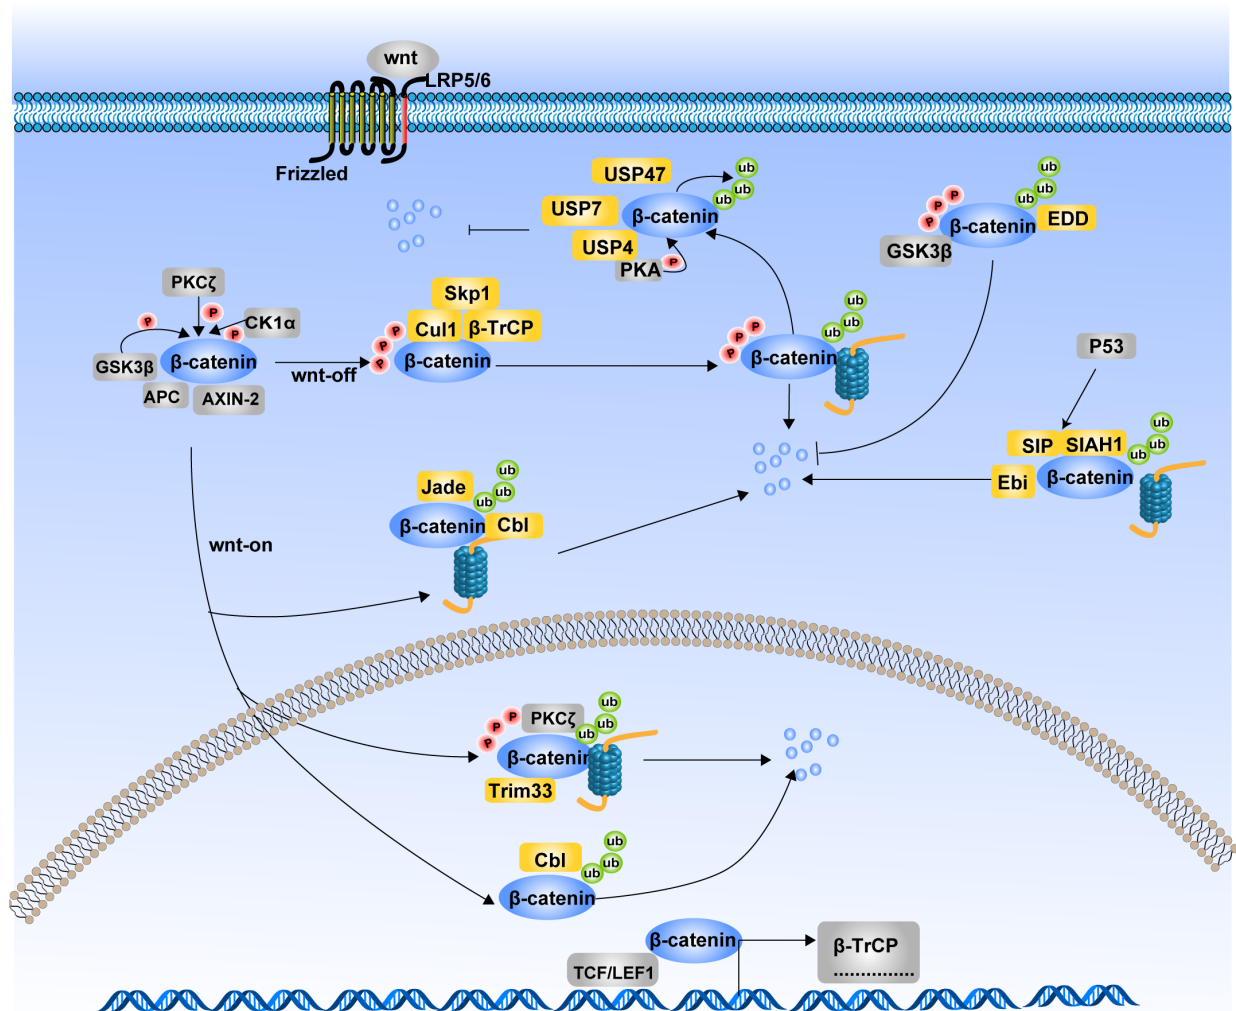

**Figure 2: Ubiquitination of  $\beta$ -catenin and its degradation.** The degradation of  $\beta$ -catenin mainly undergoes through Ubiquitin Proteasome System (UPS). Different ubiquitin E3 ligases in the cytoplasm and nucleus regulate the ubiquitination of  $\beta$ -catenin. Ubiquitination of  $\beta$ -catenin can be occurred either in the Wnt-off state or in the Wnt-on state. Together with Cul1 and Skp1,  $\beta$ -TrCP mediates the ubiquitination of  $\beta$ -catenin in the Wnt-off state. While Jade1, c-Cbl and Trim33 induce ubiquitination of  $\beta$ -catenin in the Wnt-on state. Additionally, SIAH1 along with SIP and Ebi, ubiquitinate  $\beta$ -catenin in response to p53 activation. Phosphorylation state is not always a necessary condition for  $\beta$ -catenin ubiquitination.  $\beta$ -TrCP and Trim33-induced ubiquitination of  $\beta$ -catenin is phosphorylation dependent, while ubiquitination of  $\beta$ -catenin by Jade-1, c-Cbl and SIAH1 are phosphorylation independent. In contrast to afore mentioned E3 ligases, EDD ubiquitinates  $\beta$ -catenin with an inhibitory effects on its degradation. Several deubiquitinases such as USP4 and USP7 can deubiquitinate  $\beta$ -catenin and interrupt its degradation process.

the nucleus due to the disassembly of the  $\beta$ -catenin destruction complex. Recently, researchers found that  $\beta$ -catenin ubiquitination in the nucleus are mainly mediated by c-Cbl and tripartite motif-containing protein 33 (TRIM33). C-Cbl is a Ring finger ubiquitin E3 ligase expressed in endothelial cells, which binds to the nuclear active non-phosphorylated  $\beta$ -catenin via the armadillo-repeat region. Indeed, c-Cbl also mediates ubiquitination of cytoplasmic  $\beta$ -catenin in a similar way to Jade1 [42]. TRIM33 is another E3 ubiquitin ligase targeting nuclear active  $\beta$ -catenin and acts regardless of Wnt signaling activation [43]. Phosphorylation of  $\beta$ -catenin at Ser715 by protein kinase C $\delta$  (PKC $\delta$ ) initiates TRIM33-mediated destabilization.

Tribbles homolog 2 (TRIB2), a member of Tribbles protein family, is found to be a direct target gene of Wnt/ $\beta$ -catenin and promotes HCC cell survival and transformation. Interestingly, a negative feedback loop exists between TRIB2 and Wnt signaling whereby TRIB2 facilitates the ubiquitination of TCF4 and  $\beta$ -catenin [44].

$\beta$ -TrCP, COP1 and Smurf1 are the TRIB2-associated E3 ligases. The four proteins scaffold into a complex with each component acting as an essential and indispensable inhibitor of Wnt activity. However, the direct relationships between the three E3 ligases and  $\beta$ -catenin have not yet been investigated. The ubiquitination of  $\beta$ -catenin is not always promoting its degradation. The E3 ubiquitin ligase identified by differential display (EDD) was discovered in recent years, which leads to an enhanced stability of  $\beta$ -catenin via ubiquitinating  $\beta$ -catenin through Lys29- or Lys11-linked ubiquitin chains [45]. Moreover, this process requires the presence of GSK3 $\beta$ , which until then had always been shown to be a negative modulator in the Wnt/ $\beta$ -catenin pathway.

Just like kinases and phosphatases oppose each other in the regulation of phosphorylation, there are also deubiquitinases that oppose ubiquitin ligases in regulating  $\beta$ -catenin ubiquitination. Ubiquitin-specific peptidase 7 (USP7) mediates deubiquitination of  $\beta$ -catenin and enhances canonical Wnt signaling [46]. Through

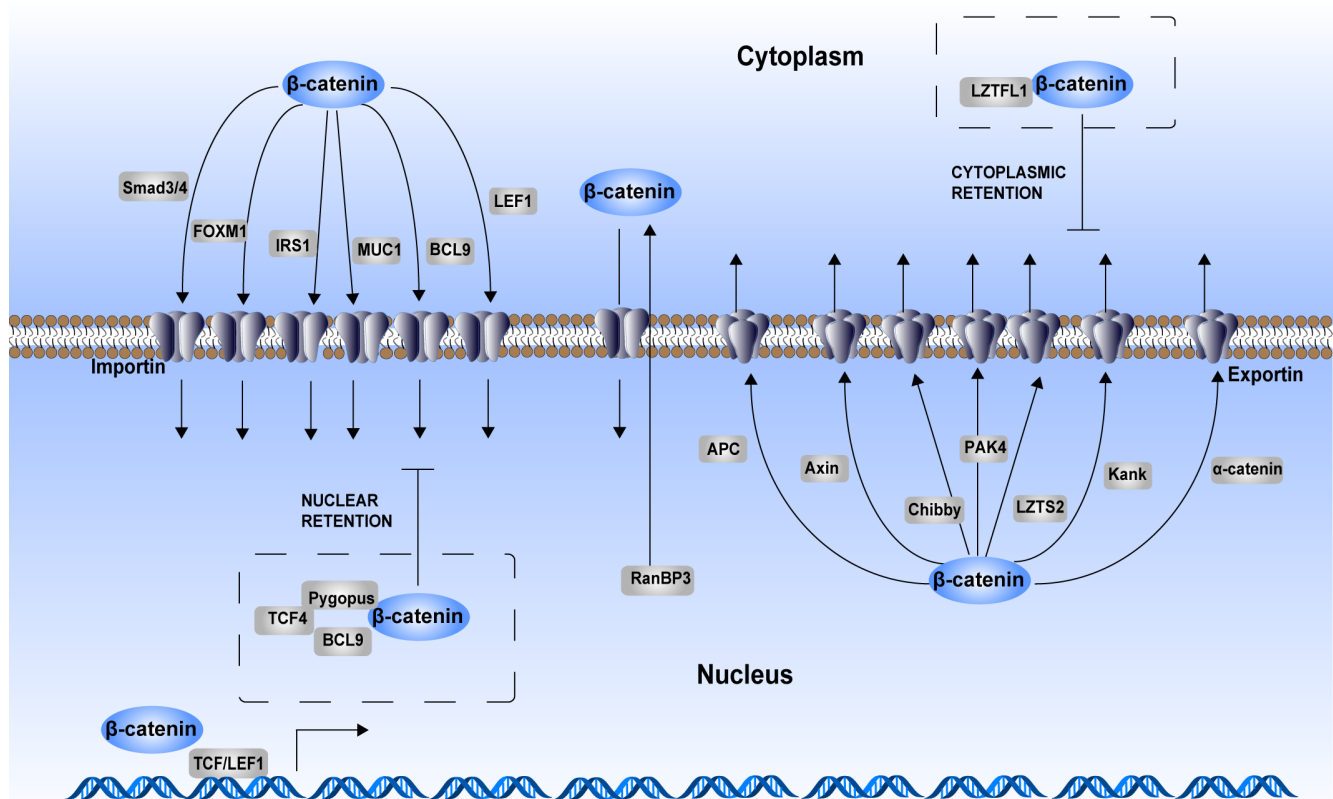

**Figure 3: Regulation of  $\beta$ -catenin cytoplasmic–nuclear trafficking.** As a consequence of aberrant activation of Wnt signaling,  $\beta$ -catenin translocates into the nucleus to act as a transcriptional activator. Although  $\beta$ -catenin itself does not have a nuclear localization sequence (NLS), its armadillo repeats mediate its nuclear translocation process. Many chaperones participate in the regulation of  $\beta$ -catenin cytoplasmic–nuclear trafficking. Smad3/4, FOXM1, IRS1, MUC1, BCL9 and LEF1 are chaperones that assist nuclear translocation of  $\beta$ -catenin in an importin-dependent manner. APC, AXIN, Chibby, PAK4, LZTS2, Kank, and  $\alpha$ -catenin are chaperones that assist with  $\beta$ -catenin cytoplasmic translocation in an exportin-dependent manner. RanBP3 also enhances  $\beta$ -catenin nuclear export, while this process is independently of exportin. In addition, some proteins form complex with  $\beta$ -catenin to maintain its cytoplasmic or nuclear retention. LZTFL1 binds with  $\beta$ -catenin to sequester it in the cytoplasm. TCF4–Pygopus–BCL9 complex helps enhancing  $\beta$ -catenin nuclear retention.

siRNA library screening, Ubiquitin-specific peptidase 47 (USP47) is identified to activate Wnt signaling by deubiquitinating  $\beta$ -catenin in the C-terminus and inhibiting its degradation [47]. Recently, ubiquitin-specific protease 4 (USP4) was identified as a deubiquitinating enzyme for  $\beta$ -catenin, which supports the stability of  $\beta$ -catenin by deubiquitinating the phosphorylated  $\beta$ -catenin and retards the nuclear translocation of  $\beta$ -catenin [48].

Unlike phosphorylated sites Ser33, Ser37 and Thr41, phosphorylation of some sites in  $\beta$ -catenin helps maintaining its stability. For instance, phosphorylation of  $\beta$ -catenin on Ser675 by PKA enhances  $\beta$ -catenin stability through inhibiting its ubiquitination [49, 50]. Moreover, Tyr654 phosphorylation of  $\beta$ -catenin by RTK reduces its interaction with E-cadherin, facilitates phosphorylation at Ser675 and increases Wnt signaling. These studies suggest that RTK and PKA inhibitors serve as efficient therapeutic strategies for patients with intestinal or other cancers with active Wnt/ $\beta$ -catenin signaling.

### **The interplay of autophagy and $\beta$ -catenin signaling**

Autophagy is an evolutionarily highly conserved catabolic pathway that degrades cellular macromolecules and organelles. Recent studies indicate that there exists a crosstalk between Wnt/ $\beta$ -catenin signaling and autophagy. On one side, the Wnt/ $\beta$ -catenin signaling pathway acts as a negative regulator of autophagy. Under nutrient rich conditions, autophagy is maintained at basal level only.  $\beta$ -Catenin limits autophagosome formation and functions as a transcriptional co-repressor of p62 through binding to the transcription factor TCF4 [16]. In multiple myeloma cells,  $\beta$ -catenin is also reported to inhibit autophagy.  $\beta$ -catenin silencing increases the expression of LC3 and Beclin 1 as well as the activation of AMPK, a major activator of autophagy [51]. A recent study indicates that glucose deprivation triggers PKC-dependent  $\beta$ -catenin proteasomal degradation, which induces autophagy [52]. On the other side,  $\beta$ -catenin itself is targeted for autophagic clearance in autolysosomes upon autophagy induction. Under nutrient deprivation conditions,  $\beta$ -catenin is selectively degraded via forming a complex with LC3, attenuating  $\beta$ -catenin/TCF4-driven autophagy inhibition so as to favor adaptation during metabolic stress [16]. Wang et al reported that activation of PKC $\alpha$ , an oncoprotein in esophageal squamous cell carcinomas, enhances  $\beta$ -catenin accumulation by suppressing autophagy. Meanwhile, activation of autophagy promotes autophagic degradation of  $\beta$ -catenin [53]. In addition, Wnt signaling is negatively regulated by autophagy through degradation of other Wnt signaling proteins. Dishevelled proteins transduce canonical Wnt signals to the GSK3 $\beta$ -destruction complex, resulting in the stabilization of  $\beta$ -catenin. Starvation induces localization of Dvl2 to

autophagosomes for degradation so as to negatively regulate Wnt signaling. The reverse correlation between Dvl expression and autophagy is observed in late stages of colon cancer, indicating the malfunction of autophagy may contribute to the aberrant activation of Wnt signaling in tumor formation [54]. These studies suggest that the positively or negatively reciprocal regulation between  $\beta$ -catenin stability and autophagy play a critical role in tumorigenesis controlled by Wnt/ $\beta$ -catenin signaling.

### **REGULATION OF $\beta$ -CATENIN SUBCELLULAR LOCALIZATION**

Nuclear concentration of  $\beta$ -catenin is the hallmark of Wnt/ $\beta$ -catenin signaling. As a consequence of aberrant activation of Wnt signaling, the active form of  $\beta$ -catenin translocates into the nucleus to act as a transcriptional activator. There exist specific regulatory mechanisms governing the subcellular translocation of  $\beta$ -catenin, independent of its stability.

The nuclear envelope is a double membrane permeated by nuclear pores. Proteins larger than 50 kDa with the nuclear localization sequence (NLS) or the nuclear export sequence (NES) require active transport by transport receptors (including importins and exportins) via the nuclear pore complexes (NPC), which are composed of 30-50 different nucleoporin proteins. Fagotto et al. demonstrated that although  $\beta$ -catenin does not contain NLS, it still could be imported into the nucleus by directly binding to the nuclear pore machinery. The characteristics of  $\beta$ -catenin are similar to importin- $\beta$ , whose nuclear transport does not require additional components of the transport machinery, such as importins, exportins or RAN-GTPase [55]. This functional similarity might due to the structural similarity of  $\beta$ -catenin and importin- $\beta$ , which share 8-13 related 42-amino-acid armadillo repeats that permits a direct interaction with the nuclear pore proteins. However, another group challenges this model. They found no evidence of a direct interaction between  $\beta$ -catenin and nucleoporins [56]. Therefore, whether there is an interaction between  $\beta$ -catenin and nucleoporins in the context of the tumor environment still needs further clarification.

Except for direct interaction with NPC, many nuclear import or export chaperones mediate the subcellular translocation and nuclear retention of  $\beta$ -catenin [57] (Figure 3). Smad3/4, FOXM1, MUC1, IRS1, BCL-9 and LEF1 act as the import chaperones. The export chaperones include Exportin1-dependent ones, such as APC, AXIN, Chibby, PAK4, LZTS2, Kank and  $\alpha$ -catenin, and Exportin1-independent ones, such as RanBP3. Moreover, the TCF4-Pyopus-BCL9 complex helps enhancing the  $\beta$ -catenin nuclear retention.

In addition to the chaperones that directly interact with  $\beta$ -catenin and assist in its translocation, some

oncoproteins or tumor suppressors regulate the shuttling process in an indirect way. N-myc downstream-regulated gene 1 (NDRG1), a potent metastasis suppressor, inhibits EMT in prostate and colon cancer cells. Overexpression of NDRG1 in colon cancer cells inhibits the nuclear localization of PAK4, increasing the levels of membrane-associated  $\beta$ -catenin and downregulating  $\beta$ -catenin transcriptional activity [58]. Custos is another protein reported to be a component of canonical Wnt signaling [59]. Custos binds to  $\beta$ -catenin in a Wnt responsive manner without affecting its stability, and the interaction is required to promote  $\beta$ -catenin nuclear translocation during

organizer formation. Although the mechanism has not been elucidated, one possibility is that Custos modulates the accessibility of  $\beta$ -catenin to the nuclear pore complex. Leucine zipper transcription factor-like 1 (LZTFL1) has been identified as a novel tumor suppressor in gastric cancer [60]. It inhibits the EMT of gastric cancer cells by inhibiting  $\beta$ -catenin nuclear translocation without affecting its protein expression. However, the precise mechanism still needs to be determined.

In general, post-translational modification of  $\beta$ -catenin itself or in coordination with the import or export chaperones directly regulate the subcellular

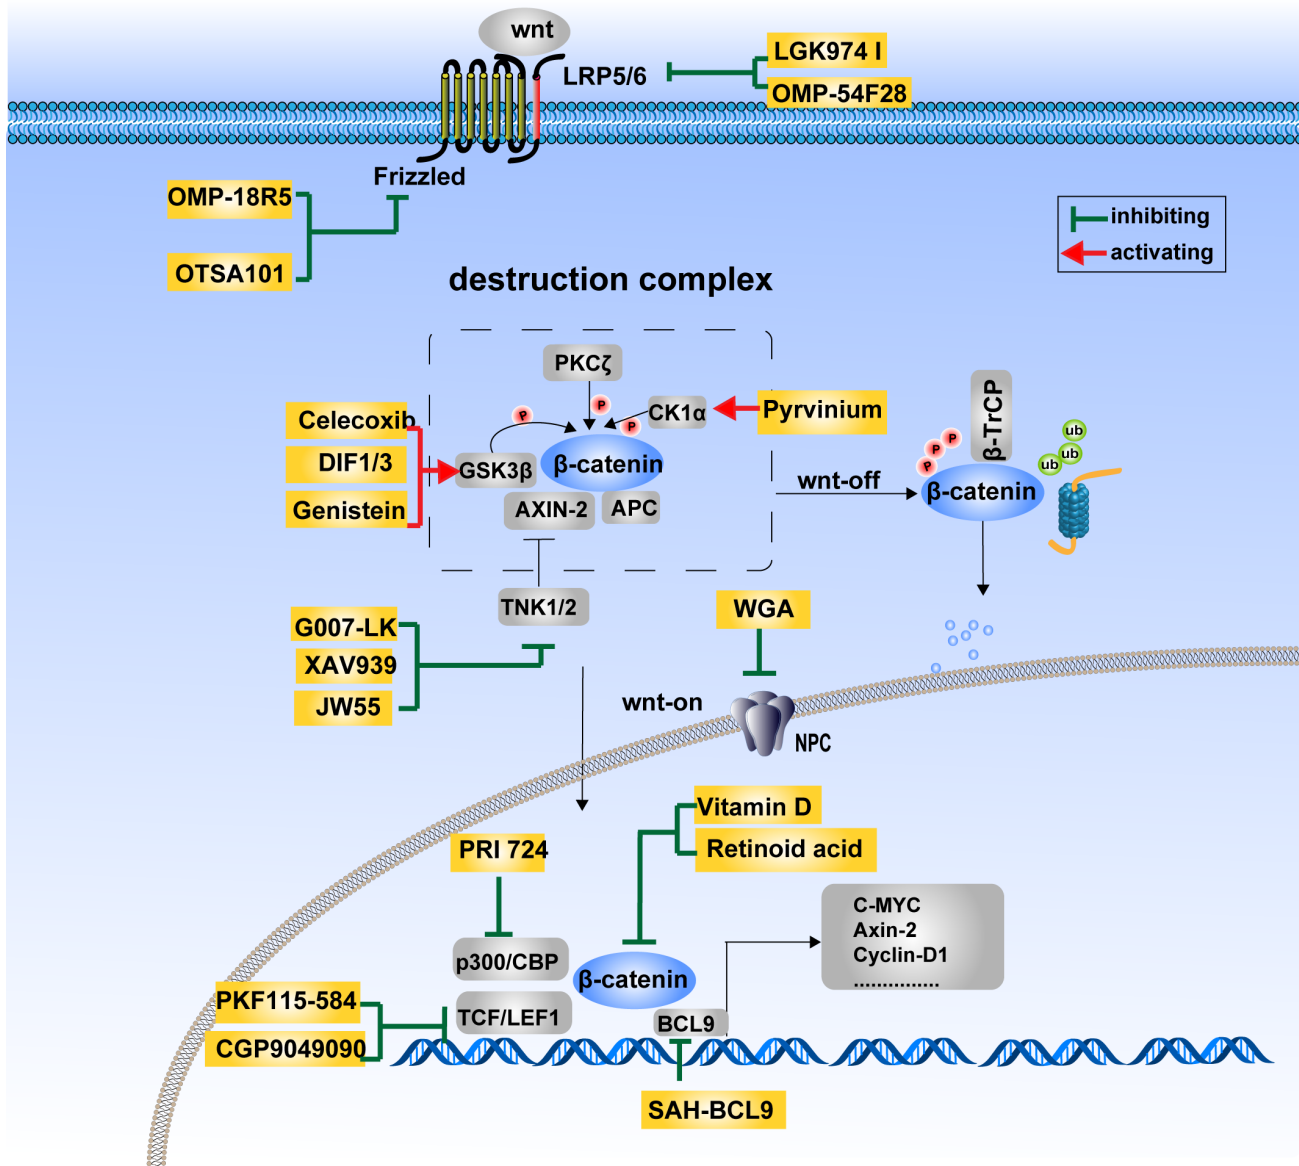

**Figure 4: Therapeutics targeting the Wnt/ $\beta$ -catenin signaling pathway.** The Wnt/ $\beta$ -catenin signaling pathway is at the center of carcinogenesis and tumor progression. Therapeutics targeting this pathway is of great potential in the development of anti-cancer drugs. The agents currently being investigated mainly targets Wnt ligands and receptors (LGK974 I, OMP-54F28, OMP-18R5, OTSA101), the  $\beta$ -catenin destruction complex (Celecoxib, DIF1/3, Genistein, Pyruvium, G007-LK, XAV939, JW55),  $\beta$ -catenin cytoplasmic–nuclear translocation (WGA) and  $\beta$ -catenin transcriptional complexes (PRI 724, Vitamin D, Retinoid acid, PKF115-584, CGP9049090, SAH-BCL9).

localization of  $\beta$ -catenin. In addition, many upstream regulators of those chaperones also influence the nuclear translocation of  $\beta$ -catenin. Besides, some proteins promote  $\beta$ -catenin retention in the nucleus or cytoplasm through a direct protein–protein interaction manner. Most of the regulators play critical roles in tumorigenesis and tumor development, providing new targets for cancer treatment.

## REGULATION OF THE TRANSCRIPTIONAL ACTIVITY OF $\beta$ -CATENIN

As a protein with no DNA binding ability,  $\beta$ -catenin is thought to form a transcriptional complex with TCF/LEF, p300/CBP, and other proteins. It functions as a transcriptional activator following nuclear translocation. Studies show that the complex is diverse and complicated in different types of cancers. More and more co-activators and regulators have been found, which involve and influence Wnt/ $\beta$ -catenin transcriptional activity.

### The transcription complex of $\beta$ -catenin

TCF proteins have DNA-binding domains, but no intrinsic transcriptional activity. In the absence of  $\beta$ -catenin, TCF4 interacts with Groucho/TLE, CtBP and histone deacetylase proteins, which leads to promoter repression. Once monoubiquitinated by X-linked inhibitor of apoptosis (XIAP), Gro/TLE dissociates from TCF/Lef, thereby allowing  $\beta$ -catenin-TCF/Lef complex assembly and promoting Wnt-specific transcriptional program [61]. In the  $\beta$ -catenin-TCF4 dimer, the C-terminus of  $\beta$ -catenin provides the transactivation domain, whereas TCF4 provides the DNA-binding domain, thereby forming a transcriptional switch. Besides interacting with TCF/LEF,  $\beta$ -catenin also binds to p300/CBP, TATA-box binding protein (TBP), Pontin52, Reptin52, Brg-1, MUC1-C, SOX10, p68/p72, FOXM1, yes-associated protein 1 (YAP1) and FBW1, which are all involved in tumor development or progression.

Homologues p300 and CBP are histone acetyltransferases (HATs), which recruit basal transcriptional machinery to the promoters. The C-terminus of  $\beta$ -catenin interacts directly with the CH3 domain of p300, thus alleviating the repression of Wnt-target genes induced by Groucho/TLE and so on [62]. Furthermore, p300 induces acetylation of  $\beta$ -catenin at Lys345, which enhances  $\beta$ -catenin-TCF4 binding affinity. Acetylation of Lys345 specifically increases the transcriptional activity of  $\beta$ -catenin in a TCF-dependent manner [63]. SWI/SNF and Rsc are two highly related, but distinct, ATP-dependent chromatin-remodeling complexes. The two complexes use Brg-1 as a common component, which has ATPase activity. Through interaction with Brg-1,  $\beta$ -catenin recruits SWI/SCF or Rsc-like complexes to TCF target

gene promoters, facilitating the chromatin remodeling that is a prerequisite for efficient transcriptional activation [64]. However, in apparent contradiction to this, Brg-1 is reported to be a tumor suppressor in both breast and colon cancer cells, and suppresses *CyclinD1* gene expression [65, 66]. The mechanisms behind these contradictory phenomena are still unknown. Pontin52 is reported with a high expression in colon cancer and promotes COX-2 expression. Indeed, Pontin52 binds with TBP and  $\beta$ -catenin to enhance the  $\beta$ -catenin transcriptional activity [70]. While, the homologous interacting partner Reptin52/TIP49 also interacts with TBP and  $\beta$ -catenin, but plays an opposite role. Two segment polarity genes in *Drosophila*, *legless* (the homolog of human BCL9) and *pygopus* are positive regulators of the Wnt/ $\beta$ -catenin signaling pathway [68]. BCL9 acts as an adaptor linking pygopus to the nuclear  $\beta$ -catenin-TCF complex. Pygopus and legless are essential transcriptional coactivators of  $\beta$ -catenin [69]. The leukemia-associated protein, Mllt10/Afl10-Dot1, is identified as another component of the  $\beta$ -catenin-TCF transcriptional complex in colorectal cancer to promote transcription elongation [70]. p68 and p72 are homologous proteins in the DEAD box family of RNA helicases that are overexpressed in colon cancer. p68 and p72 form complexes with  $\beta$ -catenin to activate  $\beta$ -catenin target gene transcription [71]. Except for augmenting  $\beta$ -catenin transcriptional activity, cytoplasmic p68 and p72 protect  $\beta$ -catenin from degradation by dissociating  $\beta$ -catenin from the APC-Axin-GSK3 $\beta$  complex. Moreover, depletion of p68 and p72 in colon cancer cells results in decreases in cell proliferation and expression of target genes such as *c-Myc* and *CyclinD 1*. SOX10 is a member of the SOX protein family and its expression is upregulated in HCC. Interestingly, SOX10 expression is positively correlated with elevated  $\beta$ -catenin levels in HCC, and  $\beta$ -catenin activity promotes oncogenic effects of SOX10. SOX10, TCF4 and  $\beta$ -catenin form a ternary complex, which binds to similar DNA sequences as TCF4 via a single HMG domain, and facilitates the binding of TCF4 with  $\beta$ -catenin [72].  $\beta$ -TrCP1/Fbw1 is a component of the Skp1-Cullin-Rbx1/F-box E3 ubiquitin ligase complex, which facilitates  $\beta$ -catenin degradation. However,  $\beta$ -TrCP1/Fbw1 enhances the transcriptional activity of  $\beta$ -catenin through binding with p300 and  $\beta$ -catenin, and co-localizing with the promoters of  $\beta$ -catenin target genes in colon cancer [73]. Hence,  $\beta$ -catenin recruits additional transcription factors to modulate its transcriptional activity in a protein–protein interaction (PPI) manner (Table 1).

### Regulators of the $\beta$ -catenin transcriptional complex

The co-activators above either have chromatin remodeling capacities, transcriptional activities or have direct DNA-binding abilities. Besides, they all interact



**Table 1: Transcriptional cofactors of  $\beta$ -catenin.**

| Transcriptional cofactors    | Negative or positive regulators | Binding site in $\beta$ -catenin | Mechanisms                                                                                                                                |
|------------------------------|---------------------------------|----------------------------------|-------------------------------------------------------------------------------------------------------------------------------------------|
| TCF family [61]              | Positive                        | Arm3-8 repeats                   | Binds to promoters of target genes.                                                                                                       |
| P300/CBP [62]                | Positive                        | C-terminus                       | Acetylates histone H3 to promote transcription; acetylates $\beta$ -catenin to enhance the interaction between $\beta$ -catenin and TCF4. |
| Brg-1 [64]                   | Positive                        | Unknown                          | Facilitating chromatin remodeling as a prerequisite for efficient transcriptional activation.                                             |
| Pontin52/CBP [67]            | Positive                        | Unknown                          | Binds with TBP and $\beta$ -catenin to promote transcription.                                                                             |
| Reptin52/TIP49 [67]          | Negative                        | Unknown                          | Plays opposite roles compared to Pontin52/TBP.                                                                                            |
| BCL9 [68]                    | Positive                        | Arm 1 repeat                     | Acts as an adaptor linking Pygopus to the nuclear $\beta$ -catenin-TCF complex to promote transcription.                                  |
| Mlt/Afl10-Dot1 [70]          | Positive                        | C-terminus                       | Essential for transcription elongation.                                                                                                   |
| p68/p72 [71]                 | Positive                        | Arm 3-8 repeats                  | Binds to promoters of target genes.                                                                                                       |
| SOX10 [72]                   | Positive                        | Unknown                          | Forms a ternary complex with TCF4 and $\beta$ -catenin.                                                                                   |
| $\beta$ TrCp1/Fbw1a [73]     | Positive                        | Interacts with P300              | Interacts with p300 and $\beta$ -catenin, and co-localizes to the promoters of $\beta$ -catenin targets.                                  |
| FOXO1 [123]                  | Positive                        | Arm 11-12 repeats                | Forms a ternary complex with TCF4 and $\beta$ -catenin.                                                                                   |
| Yes-associated protein 1 [7] | Positive                        | Unknown                          | Forms a ternary complex with TBX5 and $\beta$ -catenin.                                                                                   |

with  $\beta$ -catenin or other components to form a complex and enhance its transcriptional activity. In addition, some regulators directly bind to  $\beta$ -catenin, interrupting or enhancing its interaction with other components of the complex. Tumor adaptation to hypoxia is mainly mediated by two transcription factors, the hypoxia-inducible factor 1 $\alpha$  or 2 $\alpha$  (HIF1 $\alpha$  or HIF2 $\alpha$ ). HIF1 $\alpha$  competes with TCF4 for direct binding to  $\beta$ -catenin at the promoter region of HIF1 $\alpha$  target genes.  $\beta$ -Catenin enhances HIF1 $\alpha$ -mediated transcription, thereby promoting cell-cycle arrest, cell survival and adaptation to hypoxia [74]. Like HIF1 $\alpha$ , HIF2 $\alpha$  interacts with  $\beta$ -catenin, but at a different site. HIF2 $\alpha$  is found to assemble with  $\beta$ -catenin and TCF to facilitate  $\beta$ -catenin target gene transcription and enhance cell proliferation [75]. The opposite actions of HIF proteins suggest that the HIF1 $\alpha$ /HIF2 $\alpha$  balance may determine cell fate when hypoxia and Wnt stimulation coexist. Besides, the microenvironment is critical to determine the transcriptional regulation.

Many proteins interact with components of the transcriptional complex to regulate  $\beta$ -catenin transcriptional activity. Here, we focus on the regulators of TCF4 and p300/CBP. The TCF4-related regulators include HOXB13, SOX4, RUNX3, CDK8, TCTP and Daxx. HOXB13 is exclusively overexpressed in the normal prostate and the colorectum tissues. HOXB13 is a negative regulator of TCF4 that promotes TCF4 degradation. A lower HOXB13 expression in colorectal cancer confers TCF4-mediated transactivation [76]. On the contrary, SOX4 activates  $\beta$ -catenin/TCF4 transcription by upregulating TCF4 at the transcriptional level without a direct  $\beta$ -catenin association [77]. As a tumor suppressor, RUNX3 inactivation occurs in many cancer types, especially in more than 80% of gastric cancers.

RUNX3 forms a ternary complex together with TCF4 and  $\beta$ -catenin, attenuating the DNA-binding activity of  $\beta$ -catenin/TCF4, independent of its own DNA-binding activity [78]. Cyclin-dependent kinase 8 (CDK8) is an oncogene that couples transcriptional regulators to the basal transcriptional machinery, and is implicated in the transcriptional regulation of key pathways involved in colon cancers. CDK8 promotes binding of  $\beta$ -catenin/TCF to the promoter of  $\beta$ -catenin targets implicated in cancer, including *MYC* [79]. Transcription factor E2F1 is a negative regulator of  $\beta$ -catenin/TCF activity. CDK8 and E2F1 both present at the *MYC* promoter, CDK8 suppresses the E2F1-dependent inhibition of  $\beta$ -catenin-mediated transcription [80]. Together, these observations suggest that therapeutic interventions targeting CDK8 may confer a clinical benefit in  $\beta$ -catenin-driven malignancies. Translational-controlled tumor protein (TCTP), a multifunctional protein, promotes cell growth, tumor progression, and inhibits apoptosis. TCTP directly interacts with TCF4 and enhances the binding affinity of  $\beta$ -catenin to TCF4, leading to the expression of Wnt target genes and glioma cell proliferation [81]. Daxx acts as a transcriptional co-regulator in multiple cell signaling pathways, and was reported to interact with several transcriptional factors, such as hormone receptors, p53, Smad4 and NF- $\kappa$ B. Daxx associates with TCF4 in DNA-bound complexes and co-upregulates the  $\beta$ -catenin/TCF4-mediated gene expression in colon cancer cells [82]. The molecular basis of this process might contribute to the weakened interaction between TCF4 and Groucho/TLE or to the recruitment of CBP to the  $\beta$ -catenin/TCF4 complex. The concrete molecular mechanisms remain to be elucidated.

p300/CBP-related regulators include HIF2 $\alpha$ ,

**Table 2: Therapeutics targeting the Wnt/ $\beta$ -catenin signaling pathway.**

| Agents                                                                  | Classification  | Targets                                                                                                                                                                |
|-------------------------------------------------------------------------|-----------------|------------------------------------------------------------------------------------------------------------------------------------------------------------------------|
| <b>Targeting of Wnt ligands or receptors</b>                            |                 |                                                                                                                                                                        |
| LGK974 I [124]                                                          | Small molecule  | Inhibiting Lipid modification of Wnt by targeting PORCN.                                                                                                               |
| OMP-54F28 [103]                                                         | Antibody        | An inhibitor of Wnt ligands.                                                                                                                                           |
| OMP-18R5 [103]                                                          | Antibody        | An inhibitor of Wnt receptor-multiple frizzleds.                                                                                                                       |
| OTSA101 [103]                                                           | Antibody        | An inhibitor of Wnt receptor-frizzled-10.                                                                                                                              |
| <b>Targeting of <math>\beta</math>-catenin stability</b>                |                 |                                                                                                                                                                        |
| Celecoxib [110]                                                         | Small molecule  | Celecoxib dampens the auto-phosphorylation of the tyrosine kinase receptor c-Met, which results in the activation of GSK3 $\beta$ and degradation of $\beta$ -catenin. |
| DIF1/3 [112]                                                            | Natural product | Activating GSK3 $\beta$ by reducing its Ser9 phosphorylation to degrade $\beta$ -catenin.                                                                              |
| Genistein [111]                                                         | Natural product | Activating GSK3 $\beta$ to degrade $\beta$ -catenin.                                                                                                                   |
| G007-LK [105]                                                           | Small molecule  | Stabilizing Axin-2 by inhibiting TNK1/2 to promote degradation of $\beta$ -catenin.                                                                                    |
| XAV939 [104]                                                            | Small molecule  | Stabilizing Axin-2 by inhibiting TNK1/2 to promote degradation of $\beta$ -catenin.                                                                                    |
| JW55 [106]                                                              | Small molecule  | Stabilizing Axin-2 by inhibiting TNK1/2 to promote degradation of $\beta$ -catenin.                                                                                    |
| Pyrrinium [107]                                                         | Small molecule  | Activating CK1 to promote $\beta$ -catenin degradation.                                                                                                                |
| <b>Targeting of <math>\beta</math>-catenin nuclear translocation</b>    |                 |                                                                                                                                                                        |
| WGA [113]                                                               | Small molecule  | Suppressing nuclear transport of $\beta$ -catenin by inhibiting NPC.                                                                                                   |
| <b>Targeting of <math>\beta</math>-catenin transcriptional activity</b> |                 |                                                                                                                                                                        |
| PRI 724 [120]                                                           | Small molecule  | Specifically downregulating the expression of $\beta$ -catenin-TCF-responsive genes by interrupting $\beta$ -catenin/CBP.                                              |
| PKF115-584 [115]                                                        | Small molecule  | Interrupting $\beta$ -catenin/TCF to inhibit target genes' transcription.                                                                                              |
| CGP9049090 [115]                                                        | Small molecule  | Interrupting $\beta$ -catenin/TCF to inhibit target genes' transcription.                                                                                              |
| Vitamin D [118]                                                         | Natural product | Competing with TCF and LEF for $\beta$ -catenin binding.                                                                                                               |
| Retinoid acid [119]                                                     | Natural product | Competing with TCF and LEF for $\beta$ -catenin binding.                                                                                                               |
| SAH-BCL-9 [114]                                                         | Peptide         | Interrupting $\beta$ -catenin/BCL-9 to inhibit target genes' transcription.                                                                                            |

KLF4 and Smad2. As mentioned above, HIF2 $\alpha$  activates  $\beta$ -catenin by recruiting p300 through its transactivation domains. KLF4 is a transcription factor highly expressed in the adult intestine. In contrast to HIF2 $\alpha$ , KLF4 was demonstrated to directly interact with the C-terminal transactivation domain of  $\beta$ -catenin and block p300/CBP recruitment by  $\beta$ -catenin. KLF4 inhibits p300/CBP-mediated  $\beta$ -catenin acetylation as well as histone acetylation on Wnt target genes, resulting in the inhibition of Wnt signaling [83]. SMAD2, a pivotal downstream effector of TGF- $\beta$  signaling, interacts with TCF4,  $\beta$ -catenin and p300 [84]. It functions as a co-activator of canonical Wnt/ $\beta$ -catenin signaling, independent of Smad4, through the histone acetyltransferase activity of p300. This function occurs in the presence of the  $\beta$ -catenin/TCF4 complex, demonstrating a mechanism how Smad2 functions as a tumor promoter in the late stages of colon cancer.

## TARGETING WNT/ $\beta$ -CATENIN SIGNALING AS AN ANTI-CANCER STRATEGY

### Wnt/ $\beta$ -catenin signaling in cancer

Associations between Wnt/ $\beta$ -catenin signaling and cancer initiation, tumor growth, tumor metastasis,

tumor dormancy, tumor immunity and tumor stem cell maintenance have been revealed over the last two decades. Constitutive activation of Wnt/ $\beta$ -catenin signaling induced by mutations of genes, or aberrant activation of Wnt receptors trigger tumorigenesis in the colon, liver, skin, breast, bone marrow, and maybe more tissues [85, 86]. It is indicated that Wnt/ $\beta$ -catenin signaling maintains populations of tumor-initiating cells or cancer stem cells [87, 88]. Mechanistically, Wnt/ $\beta$ -catenin signaling pathway upregulates the expression of cell cycle-related proteins, such as Cyclin B1 and Cyclin C to promote carcinogenesis and development of HCC [89]. When talking about tumor growth, Wnt/ $\beta$ -catenin signaling may play opposing roles in different tumor tissues. It has been reported that inhibition of  $\beta$ -catenin signaling could suppress pancreatic tumor growth by disrupting the nuclear  $\beta$ -catenin/TCF1 complex [90]. In addition,  $\beta$ -catenin is sufficient to enhance the growth of myeloma cells in vitro and of prostate tumors in mouse models [91, 92]. However, Wnt-3a and  $\beta$ -catenin inhibit the growth of human and mouse melanoma cells grafted in mice, which gives a new cellular activity to the Wnt/ $\beta$ -catenin pathway [93]. Wnt/ $\beta$ -catenin also drives cancer metastasis in tumors such as breast cancer, HCC and melanoma [9, 94, 95]. Although Wnt/ $\beta$ -catenin signaling promotes tumor metastatic spread by increasing migration and/or invasion in most cases, it inhibits migration and brings about a lower proliferation index while inducing metastasis in the

case melanoma, adding to the complexity of this topic [93, 96]. Tumor dormancy is a major reason for tumor relapse, often occurring many years after the removal of a primary tumor.  $\beta$ -Catenin has been shown to upregulate urokinase plasminogen activator (uPA) expression in colorectal tumors to promote invasion, metastasis and dormancy in human colorectal tumors [97]. In a study about latency competent cancer (LCC) cells, they found that autocrine DKK1 secretion induced attenuated Wnt signaling is associated with LCC quiescence [98].

Wnt/ $\beta$ -catenin signaling also participates in the regulation of tumor immunology. By analyzing 266 metastatic human cutaneous melanoma samples, Spranger et al. revealed that tumor-intrinsic  $\beta$ -catenin activation dominantly excludes T cell infiltration into the melanoma tumor microenvironment. Therefore, intrinsic  $\beta$ -catenin activation may represent one mechanism of primary resistance to T cell-based immune-oncology therapies [99]. Cross-priming helps to generate anti-tumor CD8<sup>+</sup>T cells.  $\beta$ -Catenin expression in DCs negatively regulates antitumor immunity by inhibiting their cross-priming ability resulting in a dampened CD8<sup>+</sup> T cell response [100]. Hence, the Wnt/ $\beta$ -catenin signaling pathway may be a potential target for anti-tumor immunotherapy.

Accumulating evidences suggest that Wnt/ $\beta$ -catenin signaling helps maintaining the stemness of cells in the embryo and the adult, as well as in cancer. The mammalian intestine contains a crypt compartment maintained by multipotent stem cells and a villus compartment extending into the lumen. Wnt signaling controls the proliferation of stem cells within the crypt base and thus drives the emergence of cells through the transit-amplifying zone into the villus. Indeed, Wnt target genes, such as LGR5, CD44 and Msi1, have become well-established markers of intestinal stem cells [11]. In the pathogenesis of colorectal cancer, Wnt/ $\beta$ -catenin signaling promotes the tumorigenesis in both the “top-down” model, in which differentiated cells repossess pluripotency and produce aberrant crypt foci that later turn into adenomas, and the “bottom-up” model, in which the stem cells at the crypt base hyperproliferate, migrate upwards and act as tumor-initiating cells [88]. Using the mouse mammary tumor virus (MMTV)-induced breast cancer model, scientists found that Wnt signaling may induce the expansion of stem-like cells during mammary tumor progression [101, 102]. As Wnt/ $\beta$ -catenin signaling greatly promotes the differentiation of many cancer stem cells, which can be precursors of mature cancer cells, it is of great significance to develop therapeutic strategies targeting this pathway to reduce the stem cell behavior. Although a number of small molecules inhibiting this pathway are being developed, some of which have been in preclinical or early clinical study, whether these molecules can reduce stem cell ratio and/or activity in patients awaits confirmation.

## Therapeutics against cancers by targeting Wnt/ $\beta$ -catenin signaling

The Wnt/ $\beta$ -catenin pathway has been proved to be crucial to various kinds of carcinoma. Therapeutic strategies targeting this signaling pathway are increasingly being proposed to aid the fight against cancer. Although no drugs specifically inhibiting this signaling pathway have been approved for the market, considerable efforts have been made towards their development. Inhibitors of the Wnt/ $\beta$ -catenin pathway can be classified into five categories according to the properties of the drugs: small molecules, peptides, antibodies, RNA interference and natural compounds. Figure 4 illustrates the potential therapeutic strategies employed against cancer, based primarily on the three regulatory mechanisms of  $\beta$ -catenin activity discussed above.

### Wnt ligand and receptor modulators

In the Wnt/ $\beta$ -catenin signaling pathway, one target is the ligand—Wnt itself, which controls the activity of the pathway. Lipid modification of Wnt by membrane-bound o-acyltransferases-porcupine (PORCN) promotes its secretion and its binding ability with cognate receptors. LGK974, a potent and specific small-molecule inhibitor of PORCN demonstrates efficacy at well-tolerated doses in multiple tumor models, such as murine breast cancer and human head and neck squamous cell carcinoma *in vivo*. The phase I clinical study of LGK974 in patients with malignancies dependent on Wnt ligands is ongoing. In opposition to the role of Wnt-3a, Wnt-5a promotes the degradation of  $\beta$ -catenin. The formylated 6-amino-acid peptide fragment, (Foxy-5), mimics the effects of Wnt-5a and is currently being tested in a phase I clinical trial. Antibodies targeting the Wnt ligands and receptors are another method by which this signaling pathway is inhibited. OMP-18R5, OTSA-101 and OMP-54F28 are antibodies against multiple frizzleds, frizzled-10 and Wnt ligand respectively, and have all been enrolled in Phase I clinical trials [103].

### The modulators of $\beta$ -catenin degradation

Axin, GSK3 $\beta$  and CK1 participate in the regulation of  $\beta$ -catenin degradation. Efforts are made to activate kinase activity and thus to reduce the stability of  $\beta$ -catenin. Axin is an important protein in promoting  $\beta$ -catenin degradation. Tankyrase1/2 is a kinase destabilizing Axin, which is chosen as a target to reduce the accumulation of  $\beta$ -catenin. G007-LK and JW55, inhibitors of TNK1/2, cause stabilization of Axin2 and thus increase degradation of  $\beta$ -catenin. The two small molecules are now in preclinical research. XAV939, another Axin stabilizer, has been in the phase I clinical trial to treat subjects with CRC, unfortunately it was stopped due to low enrollment [104-106]. As pivotal kinases destabilizing  $\beta$ -catenin, GSK3 $\beta$

and CK1 are also chosen as drug targets. Pyrvinium is a small molecule that activates CK1 to promote  $\beta$ -catenin degradation [107]. Recent studies show that non-steroidal anti-inflammatory drugs (NSAIDs) prevent the development of polyps and reduce tumor size in familial adenomatous polyposis patients through different mechanisms [108]. Firstly, NSAIDs reduce the expression of Cox-2, which is highly expressed in various cancers. Secondly, Cox-2-derived PGE2 activates the Wnt-signaling cascade at the level of  $\beta$ -catenin degradation through cAMP/PKA-mediated phosphorylation to increase stemness and progenitor populations [109]. Thirdly, drugs like celecoxib dampen the auto-phosphorylation of the tyrosine kinase receptor c-Met, which results in the activation of GSK3 $\beta$  and degradation of  $\beta$ -catenin [110]. Lastly, differentiation-inducing factor (DIF) and Genistein, a soy-derived isoflavone and phytoestrogen, have also been reported to promote  $\beta$ -catenin degradation by activating GSK3 $\beta$  [111, 112].

### **The modulators of $\beta$ -catenin subcellular localization**

Therapeutics targeting  $\beta$ -catenin cellular distribution is a promising potential strategy for the inhibition of Wnt/ $\beta$ -catenin pathway, although few inhibitors have yet been identified. One strategy would be to disturb the function of NPC, as  $\beta$ -catenin is transported through NPC during its subcellular localization either via a direct interaction or via an active, receptor-mediated mechanism. Wheat germ agglutinin (WGA), an inhibitor of NPC, has been reported to suppress nuclear transport of  $\beta$ -catenin [113]. However, the NPC is the conduit for numerous proteins translocating to the nucleus, so universal inhibitors targeting the NPC have a fundamental lack of specificity, which might interrupt normal cell homeostasis. Despite this, searching for small molecules specifically disturbing the interaction of  $\beta$ -catenin and NPC proteins is a potential future method.

In addition to NPC, nuclear import chaperones of  $\beta$ -catenin, such as Smad3/4, FOXM1, MUC1, IRS1, BCL-9 and LEF1, are also potential targets. Small molecules, especially peptides designed to interrupt the PPI of  $\beta$ -catenin and its specific import chaperones in specific tumor types, reduce the accumulation of  $\beta$ -catenin in the nucleus and suppress its transcriptional activity. For example, a peptide targeting BCL-9, an import chaperone as well as a transcriptional co-activator of  $\beta$ -catenin, has been developed [114] (discussed later). Besides molecules targeting the  $\beta$ -catenin nuclear transportation process, therapeutics enhancing the cytoplasmic retention or disturbing the nuclear retention of  $\beta$ -catenin might also be good potential choices.

### **The modulators of the $\beta$ -catenin transcriptional complex**

High frequency of Wnt pathway gene mutations enhances the  $\beta$ -catenin transcriptional activity independent of upstream factors, which would limit the applicability of

some therapeutic modalities mentioned above. Therefore, more efforts have been made to directly attenuate the function of  $\beta$ -catenin in the nucleus. As  $\beta$ -catenin functions as a transcriptional activator in a complex with TCF4, P300/CBP, BCL9 and so on, small molecules targeting these PPIs have a potentially bright future. More than thirty compounds and a stapled  $\alpha$ -helical peptide have been reported to interfere with the  $\beta$ -catenin–TCF4 interaction [115-117]. The crystal structure analysis revealed that  $\beta$ -catenin utilizes the same groove of a large surface (3700 Å<sup>2</sup>) to bind with TCF4, Cadherin and APC. Moreover, the dissociation constant (Kd) of the  $\beta$ -catenin–TCF PPI is much lower than those of the  $\beta$ -catenin-cadherin and  $\beta$ -catenin–APC PPIs, making it difficult to obtain a highly selective inhibitor.  $\beta$ -Catenin function loss in cadherin junctions increases cell migration and induces metastasis. Furthermore, dissociation of APC from  $\beta$ -catenin results in its nuclear accumulation. These facts emphasize that obtaining high selectivity is a major concern for drug development. Recently, J. Leon Catrow et al have discovered a series of compounds with much higher selectivity for the  $\beta$ -catenin–TCF interaction over  $\beta$ -catenin–Cadherin and  $\beta$ -catenin–APC interactions. For example, PKF115-584 and CGP049090, which are obtained through optimization of the Acyl Hydrazone Moiety [115]. This is a good starting point from which to discover more and more high-value selective molecules to disrupt the  $\beta$ -catenin–TCF PPI. In addition, Vitamin D and retinoid acid have been shown to compete with TCF and LEF for  $\beta$ -catenin binding [118, 119]. Other than TCF,  $\beta$ -catenin also recruits transcriptional coactivators such as cyclic AMP response element-binding protein (CBP) or its closely-related homolog, p300. Katayoon H. Emami et al have discovered a selectively low molecular-weight inhibitor (ICG-001 or PRI 724) targeting  $\beta$ -catenin–CBP, but not  $\beta$ -catenin–p300, which specifically downregulates the expression of  $\beta$ -catenin–TCF-responsive genes [120]. Phase I and II clinical trials of ICG-001 for acute and chronic myeloid leukemia were completed in October 2015. This provides a new perspective on the selection of PPI targets. BCL9 is another good target, which helps Wnt to upregulate the stemness of cells in the colon epithelium and in adenocarcinomas [121]. Takada et al developed a stabilized  $\alpha$  helix of BCL9 (SAH-BCL9), disassembles native  $\beta$ -catenin–BCL9 complexes and selectively suppresses Wnt transcription, with anti-tumor effects consistent with this mechanism [114]. Thus targeting the  $\beta$ -catenin–TCF interaction is not the only means to inhibit the transcriptional activity of  $\beta$ -catenin, indicating that more fundamental mechanistic studies need to be undertaken in order to deepen our knowledge in this field. Given the gene mutations of Wnt pathway components present in numerous malignancies, drug therapies aimed at disrupting the  $\beta$ -catenin transcriptional complex seem to be a rational, effective and potentially universal strategy against cancer.

## CONCLUSIONS AND FUTURE PERSPECTIVES

Based on early discoveries linking the activation of Wnt/ $\beta$ -catenin signaling to HCC, breast and colon carcinomas, it has generally been accepted that aberrant activation of Wnt signaling promotes tumor initiation and progression. The activity of  $\beta$ -catenin is under the control of several highly regulated processes, including ligand–receptor interactions,  $\beta$ -catenin stability,  $\beta$ -catenin nuclear translocation and  $\beta$ -catenin transcriptional activity. Future studies aimed at determining the mechanisms that control these processes will be necessary to identify pivotal signaling nodes that could be targeted by therapeutic interventions.

The complexity of the Wnt signaling pathway offers multiple levels of therapeutic intervention and currently there are a plethora of interventional approaches being explored to reduce Wnt/ $\beta$ -catenin signaling output. For example, great efforts have been made to interrupt upstream Wnt signaling events, including Wnt lipidation, Wnt secretion, and ligand-receptor interactions [122]. Some compounds have already reached clinical trials to assess their applicability as cancer therapeutics. However, sometimes such inhibitors targeting upstream signaling events may prove ineffective due to downstream mutations. Hence, targeting the downstream effectors of the Wnt/ $\beta$ -catenin signaling pathway in the nucleus might be more effective. For example, efforts have been taken to inhibit the nuclear transport of  $\beta$ -catenin, especially by interrupting its interaction with the nucleoporin proteins. Although no candidate compound has been brought out at the present stage due to the issue of specificity, we believe that targeting the nuclear transport of  $\beta$ -catenin holds therapeutic potential and deserves further investigation. Furthermore, small molecules and stapled peptides designed to disrupt LEF-1– $\beta$ -catenin, CBP– $\beta$ -catenin or BCL9– $\beta$ -catenin transcription factor complexes can disrupt the final effector state of  $\beta$ -catenin and exhibit great promise for treating cancers.

## ACKNOWLEDGMENTS

This work was supported by grants from the National Natural Science Foundation of China (81530093, 81273529 to ZWH; 81472717, 81673474 to FH); Beijing Natural Science Foundation (7162133 to FH) and CAMS Innovation Fund for Medical Sciences (2016-I2M-1-007 to ZWH and FH).

We sincerely apologize for not being able to keep as many important primary papers in the References because of strict space constraints.

## CONFLICTS OF INTEREST

We declare that we have no conflicts of interest.

## REFERENCES

1. van Ooyen A, Nusse R. Structure and nucleotide sequence of the putative mammary oncogene int-1; proviral insertions leave the protein-encoding domain intact. *Cell*. 1984; 39: 233-240.
2. Behrens J, von Kries JP, Kühl M, Bruhn L, Wedlich D, Grosschedl R, Birchmeier W. Functional interaction of beta-catenin with the transcription factor LEF-1. *Nature*. 1996; 382: 638-642.
3. Peifer M, Pai LM, Casey M. Phosphorylation of the Drosophila adherens junction protein Armadillo: roles for wingless signal and zeste-white 3 kinase. *Dev Biol*. 1994; 166: 543-556.
4. Rubinfeld B, Albert I, Porfiri E, Fiol C, Munemitsu S, Polakis P. Binding of GSK3beta to the APC-beta-catenin complex and regulation of complex assembly. *Science*. 1996; 272:1023-1026.
5. Yost C, Torres M, Miller JR, Huang E, Kimelman D, Moon RT. The axis-inducing activity, stability, and subcellular distribution of beta-catenin is regulated in Xenopus embryos by glycogen synthase kinase 3. *Genes Dev*. 1996; 10: 1443-1454.
6. Khramtsov AI, Khramtsova GF, Tretiakova M, Huo D, Olopade OI, Goss KH. Wnt/beta-catenin pathway activation is enriched in basal-like breast cancers and predicts poor outcome. *Am J Pathol*. 2010; 176: 2911-2920.
7. Tao J, Calvisi DF, Ranganathan S, Cigliano A, Zhou L, Singh S, Jiang L, Fan B, Terracciano L, Armeanu-Ebinger S, Ribback S, Dombrowski F, Evert M, et al. Activation of beta-catenin and Yap1 in human hepatoblastoma and induction of hepatocarcinogenesis in mice. *Gastroenterology*. 2014; 147: 690-701.
8. Kobayashi M, Honma T, Matsuda Y, Suzuki Y, Narisawa R, Ajioka Y, Asakura H. Nuclear translocation of beta-catenin in colorectal cancer. *Br J Cancer*. 2000; 82: 1689-1693.
9. Damsky WE, Curley DP, Santhanakrishnan M, Rosenbaum LE, Platt JT, Gould Rothberg BE, Taketo MM, Dankort D, Rimm DL, McMahon M, Bosenberg M.  $\beta$ -Catenin signaling controls metastasis in Braf-activated Pten-deficient melanomas. *Cancer Cell*. 2011; 20: 741-754.
10. Gekas C, D'Altri T, Aligue R, Gonzalez J, Espinosa L, Bigas A.  $\beta$ -Catenin is required for T-cell leukemia initiation and MYC transcription downstream of Notch1. *Leukemia*. 2016; 30: 2002-2010.
11. Valkenburg KC, Graveel CR, Zylstra-Diegel CR, Zhong Z, Williams BO. Wnt/beta-catenin Signaling in Normal and Cancer Stem Cells. *Cancers (Basel)*. 2011; 3: 2050-2079.
12. Hong Y, Manoharan I, Suryawanshi A, Majumdar T,

- Angus-Hill ML, Koni PA, Manicassamy B, Mellor AL, Munn DH, Manicassamy S.  $\beta$ -Catenin promotes regulatory T-cell responses in tumors by inducing vitamin A metabolism in dendritic cells. *Cancer Res.* 2015; 75: 656-665.
13. Johnson V, Volikos E, Halford SE, Eftekhari Sadat ET, Popat S, Talbot I, Truninger K, Martin J, Jass J, Houlston R, Atkin W, Tomlinson IP, Silver AR. Exon 3 beta-catenin mutations are specifically associated with colorectal carcinomas in hereditary non-polyposis colorectal cancer syndrome. *Gut.* 2005; 54: 264-267.
  14. Morin PJ, Sparks AB, Korinek V, Barker N, Clevers H, Vogelstein B, Kinzler KW. Activation of beta-catenin-Tcf signaling in colon cancer by mutations in beta-catenin or APC. *Science.* 1997; 275: 1787-1790.
  15. White BD, Chien AJ, Dawson DW. Dysregulation of Wnt/beta-catenin signaling in gastrointestinal cancers. *Gastroenterology.* 2012; 142: 219-232.
  16. Petherick KJ, Williams AC, Lane JD, Ordonez-Moran P, Huelsken J, Collard TJ, Smartt HJ, Batson J, Malik K, Paraskeva C, Greenhough A. Autolysosomal beta-catenin degradation regulates Wnt-autophagy-p62 crosstalk. *EMBO J.* 2013; 32: 1903-1916.
  17. Stamos JL, Weis WI. The beta-catenin destruction complex. *Cold Spring Harb Perspect Biol.* 2013; 5: a007898.
  18. Salic A, Lee E, Mayer L, Kirschner MW. Control of beta-catenin stability: reconstitution of the cytoplasmic steps of the wnt pathway in *Xenopus* egg extracts. *Mol Cell.* 2000; 5: 523-532.
  19. Cadigan J, Kim KM. APC and  $\beta$ -catenin degradation. N $\ddot{a}$ thke IS, McCartney BM (ed), 2009; 656.
  20. Behrens J, Jerchow BA, Wurtele M, Grimm J, Asbrand C, Wirtz R, Kuhl M, Wedlich D, Birchmeier W. Functional interaction of an axin homolog, conductin, with beta-catenin, APC, and GSK3 $\beta$ . *Science.* 1998; 280: 596-599.
  21. Amit S, Hatzubai A, Birman Y, Andersen JS, Ben-Shushan E, Mann M, Ben-Neriah Y, Alkalay I. Axin-mediated CKI phosphorylation of beta-catenin at Ser 45: a molecular switch for the Wnt pathway. *Genes Dev.* 2002; 16: 1066-1076.
  22. Ikeda S, Kishida S, Yamamoto H, Murai H, Koyama S, Kikuchi A. Axin, a negative regulator of the Wnt signaling pathway, forms a complex with GSK-3 $\beta$  and beta-catenin and promotes GSK-3 $\beta$ -dependent phosphorylation of beta-catenin. *EMBO J.* 1998; 17: 1371-1384.
  23. Powell SM, Zilz N, Beazer-Barclay Y, Bryan TM, Hamilton SR, Thibodeau SN, Vogelstein B, Kinzler KW. APC mutations occur early during colorectal tumorigenesis. *Nature.* 1992; 359: 235-237.
  24. Yang VW. APC as a checkpoint gene: the beginning or the end? *Gastroenterology.* 2002; 123: 935-939.
  25. He X, Semenov M, Tamai K, Zeng X. LDL receptor-related proteins 5 and 6 in Wnt/beta-catenin signaling: arrows point the way. *Development.* 2004; 131: 1663-1677.
  26. Logan CY, Nusse R. The Wnt signaling pathway in development and disease. *Annu Rev Cell Dev Biol.* 2004; 20: 781-810.
  27. Zeng X, Huang H, Tamai K, Zhang X, Harada Y, Yokota C, Almeida K, Wang J, Doble B, Woodgett J, Wynshaw-Boris A, Hsieh JC, He X. Initiation of Wnt signaling: control of Wnt coreceptor Lrp6 phosphorylation/activation via frizzled, dishevelled and axin functions. *Development.* 2008; 135: 367-375.
  28. Tamai K, Zeng X, Liu C, Zhang X, Harada Y, Chang Z, He X. A mechanism for Wnt coreceptor activation. *Mol Cell.* 2004; 13: 149-156.
  29. Zhang W, Yang J, Liu Y, Chen X, Yu T, Jia J, Liu C. PR55 alpha, a regulatory subunit of PP2A, specifically regulates PP2A-mediated beta-catenin dephosphorylation. *J Biol Chem.* 2009; 284: 22649-22656.
  30. Piao S, Lee SH, Kim H, Yum S, Stamos JL, Xu Y, Lee SJ, Lee J, Oh S, Han JK, Park BJ, Weis WI, Ha NC. Direct inhibition of GSK3 $\beta$  by the phosphorylated cytoplasmic domain of LRP6 in Wnt/beta-catenin signaling. *PLoS One.* 2008; 3: e4046.
  31. Wu G, Huang H, Garcia Abreu J, He X. Inhibition of GSK3 phosphorylation of beta-catenin via phosphorylated PPPSPXS motifs of Wnt coreceptor LRP6. *PLoS One.* 2009; 4: e4926.
  32. van Amerongen R, Berns A. Re-evaluating the role of Frat in Wnt-signal transduction. *Cell Cycle.* 2005; 4: 1065-1072.
  33. Caspi M, Perry G, Skalka N, Meisel S, Firsow A, Amit M, Rosin-Arbesfeld R. Aldolase positively regulates of the canonical Wnt signaling pathway. *Mol Cancer.* 2014; 13: 164.
  34. Llado V, Nakanishi Y, Duran A, Reina-Campos M, Shelton PM, Linares JF, Yajima T, Campos A, Aza-Blanc P, Leitges M, Diaz-Meco MT, Moscat J. Repression of Intestinal Stem Cell Function and Tumorigenesis through Direct Phosphorylation of beta-Catenin and Yap by PKC $\zeta$ . *Cell Rep.* 2015; S2211-1247: 00008-X.
  35. Yu N, Kakunda M, Pham V, Lill JR, Du P, Wongchenko M, Yan Y, Firestein R, Huang X. HSP105 recruits protein phosphatase 2A to dephosphorylate beta-catenin. *Mol Cell Biol.* 2015; 35: 1390-1400.
  36. Liu Y, Zhou R, Yuan X, Han N, Zhou S, Xu H, Guo M, Yu S, Zhang C, Yin T, Wu K. DACH1 is a novel predictive and prognostic biomarker in hepatocellular carcinoma as a negative regulator of Wnt/beta-catenin signaling. *Oncotarget.* 2015; 6: 8621-8634. doi: 10.18632/oncotarget.3281.
  37. Chua HH, Tsuei DJ, Lee PH, Jeng YM, Lu J, Wu JF, Su DS, Chen YH, Chien CS, Kao PC, Lee CN, Hu RH, Ni YH, et al. RBMY, a novel inhibitor of glycogen synthase kinase 3 $\beta$ , increases tumor stemness and predicts poor prognosis of hepatocellular carcinoma. *Hepatology.* 2015; 62: 1480-1496.
  38. Chen X, Zhang L, Zheng S, Zhang T, Li M, Zhang X, Zeng

- Z, McCrae MA, Zhao J, Zhuang H, Lu F. Hepatitis B Virus X Protein Stabilizes Cyclin D1 and Increases Cyclin D1 Nuclear Accumulation through ERK-Mediated Inactivation of GSK-3beta. *Cancer Pre Res (Phila)*. 2015; 8: 455-463.
39. Spiegelman VS, Slaga TJ, Pagano M, Minamoto T, Ronai Z, Fuchs SY. Wnt/beta-catenin signaling induces the expression and activity of betaTrCP ubiquitin ligase receptor. *Mol Cell*. 2000; 5: 877-882.
  40. Chitalia VC, Foy RL, Bachschmid MM, Zeng L, Panchenko MV, Zhou MI, Bharti A, Seldin DC, Lecker SH, Dominguez I, Cohen HT. Jade-1 inhibits Wnt signalling by ubiquitylating beta-catenin and mediates Wnt pathway inhibition by pVHL. *Nat Cell Biol*. 2008; 10: 1208-1216.
  41. Matsuzawa SI, Reed JC. Siah-1, SIP, and Ebi Collaborate In a Novel Pathway for  $\beta$ -catenin Degradation Linked to P53 Responses. *Mol Cell*. 2001; 7: 915-926.
  42. Chitalia V, Shivanna S, Martorell J, Meyer R, Edelman E, Rahimi N. c-Cbl, a ubiquitin E3 ligase that targets active beta-catenin: a novel layer of Wnt signaling regulation. *J Biol Chem*. 2013; 288: 23505-23517.
  43. Xue J, Chen Y, Wu Y, Wang Z, Zhou A, Zhang S, Lin K, Aldape K, Majumder S, Lu Z, Huang S. Tumour suppressor TRIM33 targets nuclear beta-catenin degradation. *Nat Commun*. 2015; 6: 6156.
  44. Xu S, Tong M, Huang J, Zhang Y, Qiao Y, Weng W, Liu W, Wang J, Sun F. TRIB2 inhibits Wnt/beta-Catenin/TCF4 signaling through its associated ubiquitin E3 ligases, beta-TrCP, COP1 and Smurf1, in liver cancer cells. *FEBS Lett*. 2014; 588: 4334-4341.
  45. Hay-Koren A, Caspi M, Zilberberg A, Rosin-Arbesfeld R. The EDD E3 ubiquitin ligase ubiquitinates and up-regulates beta-catenin. *Mol Biol Cell*. 2011; 22: 399-411.
  46. Ma P, Yang X, Kong Q, Li C, Yang S, Li Y, Mao B. The ubiquitin ligase RNF220 enhances canonical Wnt signaling through USP7-mediated deubiquitination of beta-catenin. *Mol Cell Biol*. 2014; 34: 4355-4366.
  47. Shi J, Liu Y, Xu X, Zhang W, Yu T, Jia J, Liu C. Deubiquitinase USP47/UBP64E Regulates beta-Catenin Ubiquitination and Degradation and Plays a Positive Role in Wnt Signaling. *Mol Cell Biol*. 2015; 35: 3301-3311.
  48. Yun S-I, Kim HH, Yoon JH, Park WS, Hahn M-J, Kim HC, Chung CH, Kim KK. Ubiquitin specific protease 4 positively regulates the WNT/ $\beta$ -catenin signaling in colorectal cancer. *Mol Oncol*. 2015; 9: 1834-1851.
  49. Hino S, Tanji C, Nakayama KI, Kikuchi A. Phosphorylation of beta-catenin by cyclic AMP-dependent protein kinase stabilizes beta-catenin through inhibition of its ubiquitination. *Mol Cell Biol*. 2005; 25: 9063-9072.
  50. van Veelen W, Le NH, Helvensteijn W, Blondin L, Theeuwes M, Bakker ER, Franken PF, van Gurp L, Meijlink F, van der Valk MA, Kuipers EJ, Fodde R, Smits R.  $\beta$ -Catenin tyrosine 654 phosphorylation increases Wnt signalling and intestinal tumorigenesis. *Gut*. 2011; 60: 1204-1212.
  51. Su N, Wang P, Li Y. Role of Wnt/beta-catenin pathway in inducing autophagy and apoptosis in multiple myeloma cells. *Oncol Lett*. 2016; 12: 4623-4629.
  52. Choi SW, Song JK, Yim YS, Yun HG, Chun KH. Glucose deprivation triggers protein kinase C-dependent beta-catenin proteasomal degradation. *J Biol Chem*. 2015; 290: 9863-9873.
  53. Wang BS, Yang Y, Lu HZ, Shang L, Zhang Y, Hao JJ, Shi ZZ, Wang XM, Liu YZ, Zhan QM, Jia XM, Wang MR. Inhibition of atypical protein kinase Ciota induces apoptosis through autophagic degradation of beta-catenin in esophageal cancer cells. *Mol Carcinog*. 2014; 53: 514-525.
  54. Gao C, Cao W, Bao L, Zuo W, Xie G, Cai T, Fu W, Zhang J, Wu W, Zhang X, Chen YG. Autophagy negatively regulates Wnt signalling by promoting Dishevelled degradation. *Nat Cell Biol*. 2010; 12: 781-790.
  55. Fagotto F, Gluck U, Gumbiner BM. Nuclear localization signal-independent and importin/karyopherin-independent nuclear import of beta-catenin. *Curr Biol*. 1998; 8:181-190.
  56. Suh EK, Gumbiner BM. Translocation of beta-catenin into the nucleus independent of interactions with FG-rich nucleoporins. *Exp Cell Res*. 2003; 290: 447-456.
  57. Morgan RG, Ridsdale J, Tonks A, Darley RL. Factors affecting the nuclear localization of beta-catenin in normal and malignant tissue. *J Cell Biochem*. 2014; 115: 1351-1361.
  58. Jin R, Liu W, Menezes S, Yue F, Zheng M, Kovacevic Z, Richardson DR. The metastasis suppressor NDRG1 modulates the phosphorylation and nuclear translocation of beta-catenin through mechanisms involving FRAT1 and PAK4. *J Cell Sci*. 2014; 127: 3116-3130.
  59. Komiya Y, Mandrekar N, Sato A, Dawid IB, Habas R. Custos controls beta-catenin to regulate head development during vertebrate embryogenesis. *Proc Natl Acad Sci USA*. 2014; 111: 13099-13104.
  60. Wang L, Guo J, Wang Q, Zhou J, Xu C, Teng R, Chen Y, Wei Q, Liu ZP. LZTFL1 suppresses gastric cancer cell migration and invasion through regulating nuclear translocation of beta-catenin. *J Can Res Clin Oncol*. 2014; 140: 1997-2008.
  61. Hanson AJ, Wallace HA, Freeman TJ, Beauchamp RD, Lee LA, Lee E. XIAP monoubiquitylates Groucho/TLE to promote canonical Wnt signaling. *Mol Cell*. 2012; 45: 619-628.
  62. Hecht A, Vlemminckx K, Stemmler MP, van Roy F, Kemler R. The p300/CBP acetyltransferases function as transcriptional coactivators of beta-catenin in vertebrates. *EMBO J*. 2000; 19: 1839-1850.
  63. Levy L, Wei Y, Labalette C, Wu Y, Renard CA, Buendia MA, Neuveut C. Acetylation of beta-catenin by p300 regulates beta-catenin-Tcf4 interaction. *Mol Cell Biol*. 2004; 24: 3404-3414.

64. Barker N, Hurlstone A, Musisi H, Miles A, Bienz M, Clevers H. The chromatin remodelling factor Brg-1 interacts with beta-catenin to promote target gene activation. *EMBO J*. 2001; 20: 4935-4943.
65. Rao M, Casimiro MC, Lisanti MP, D'Amico M, Wang C, Shirley LA, Leader JE, Liu M, Stallcup M, Engel DA, Murphy DJ, Pestell RG. Inhibition of cyclin D1 gene transcription by Brg-1. *Cell Cycle*. 2008; 7: 647-655.
66. Wang G, Fu Y, Yang X, Luo X, Wang J, Gong J, Hu J. Brg-1 targeting of novel miR550a-5p/RNF43/Wnt signaling axis regulates colorectal cancer metastasis. *Oncogene*. 2015; 35: 651-661.
67. Bauer A, Chauvet S, Huber O, Usseglio F, Rothbacher U, Aragnol D, Kemler R, Pradel J. Pontin52 and reptin52 function as antagonistic regulators of beta-catenin signalling activity. *EMBO J*. 2000; 19: 6121-6130.
68. Kramps T, Peter O, Brunner E, Nellen D, Froesch B, Chatterjee S, Murone M, Zullig S, Basler K. Wnt/wingless signaling requires BCL9/legless-mediated recruitment of pygopus to the nuclear beta-catenin-TCF complex. *Cell*. 2002; 109: 47-60.
69. Hoffmans R, Stadeli R, Basler K. Pygopus and legless provide essential transcriptional coactivator functions to armadillo/beta-catenin. *Curr Biol*. 2005; 15: 1207-1211.
70. Mahmoudi T, Boj SF, Hatzis P, Li VS, Taouatas N, Vries RG, Teunissen H, Begthel H, Korving J, Mohammed S, Heck AJ, Clevers H. The leukemia-associated Mllt10/Af10-Dot1l are Tcf4/beta-catenin coactivators essential for intestinal homeostasis. *PLoS Biol*. 2010; 8: e1000539.
71. Shin S, Rossow KL, Grande JP, Janknecht R. Involvement of RNA helicases p68 and p72 in colon cancer. *Cancer Res*. 2007; 67: 7572-7578.
72. Zhou D, Bai F, Zhang X, Hu M, Zhao G, Zhao Z, Liu R. SOX10 is a novel oncogene in hepatocellular carcinoma through Wnt/beta-catenin/TCF4 cascade. *Tumour Biol*. 2014; 35: 9935-9940.
73. Kimbrel EA, Kung AL. The F-box protein beta-TrCP1/Fbw1a interacts with p300 to enhance beta-catenin transcriptional activity. *J Biol Chem*. 2009; 284: 13033-13044.
74. Kaidi A, Williams AC, Paraskeva C. Interaction between beta-catenin and HIF-1 promotes cellular adaptation to hypoxia. *Nat Cell Biol*. 2007; 9: 210-217.
75. Choi H, Chun YS, Kim TY, Park JW. HIF-2alpha enhances beta-catenin/TCF-driven transcription by interacting with beta-catenin. *Cancer Res*. 2010; 70: 10101-10111.
76. Jung C, Kim RS, Zhang H, Lee SJ, Sheng H, Loehrer PJ, Gardner TA, Jeng MH, Kao C. HOXB13 is downregulated in colorectal cancer to confer TCF4-mediated transactivation. *Br J Cancer*. 2005; 92: 2233-2239.
77. Saegusa M, Hashimura M, Kuwata T. Sox4 functions as a positive regulator of beta-catenin signaling through upregulation of TCF4 during morular differentiation of endometrial carcinomas. *Lab Invest*. 2012; 92: 511-521.
78. Ito K, Lim AC, Salto-Tellez M, Motoda L, Osato M, Chuang LS, Lee CW, Voon DC, Koo JK, Wang H, Fukamachi H, Ito Y. RUNX3 attenuates beta-catenin/T cell factors in intestinal tumorigenesis. *Cancer Cell*. 2008; 14: 226-237.
79. Firestein R, Bass AJ, Kim SY, Dunn IF, Silver SJ, Guney I, Freed E, Ligon AH, Vena N, Ogino S, Chheda MG, Tamayo P, Finn S, et al. CDK8 is a colorectal cancer oncogene that regulates  $\beta$ -catenin activity. *Nature*. 2008; 455: 547-551.
80. Morris EJ, Ji JY, Yang F, Di Stefano L, Herr A, Moon NS, Kwon EJ, Haigis KM, Näär AM, Dyson NJ. E2F1 represses beta-catenin transcription and is antagonized by both pRB and CDK8. *Nature*. 2008; 455: 552-556.
81. Gu X, Yao L, Ma G, Cui L, Li Y, Liang W, Zhao B, Li K. TCTP promotes glioma cell proliferation in vitro and in vivo via enhanced beta-catenin/TCF-4 transcription. *Neuro Oncol*. 2014; 16: 217-227.
82. Huang YS, Shih HM. Daxx positively modulates beta-catenin/TCF4-mediated transcriptional potential. *Biochem Biophys Res Commun*. 2009; 386: 762-768.
83. Evans PM, Chen X, Zhang W, Liu C. KLF4 interacts with beta-catenin/TCF4 and blocks p300/CBP recruitment by beta-catenin. *Mol Cell Biol*. 2010; 30: 372-381.
84. Hirota M, Watanabe K, Hamada S, Sun Y, Strizzi L, Mancino M, Nagaoka T, Gonzales M, Seno M, Bianco C, Salomon DS. Smad2 functions as a co-activator of canonical Wnt/beta-catenin signaling pathway independent of Smad4 through histone acetyltransferase activity of p300. *Cell Signal*. 2008; 20: 1632-1641.
85. Fodde R, Brabletz T. Wnt/beta-catenin signaling in cancer stemness and malignant behavior. *Curr Opin Cell Biol*. 2007; 19: 150-158.
86. Monga SP.  $\beta$ -Catenin Signaling and Roles in Liver Homeostasis, Injury, and Tumorigenesis. *Gastroenterology*. 2015; 148: 1294-1310.
87. Anastas JN, Moon RT. WNT signalling pathways as therapeutic targets in cancer. *Nat Rev Cancer*. 2013; 13: 11-26.
88. Basu S, Haase G, Ben-Ze'ev A. Wnt signaling in cancer stem cells and colon cancer metastasis. *F1000Res*. 2016; 11: 5.
89. Vilchez V, Turcios L, Marti F, Gedaly R. Targeting Wnt/beta-catenin pathway in hepatocellular carcinoma treatment. *World J Gastroenterol*. 2016; 22: 823-832.
90. Pramanik KC, Fofaria NM, Gupta P, Ranjan A, Kim SH, Srivastava SK. Inhibition of beta-catenin signaling suppresses pancreatic tumor growth by disrupting nuclear beta-catenin/TCF-1 complex: critical role of STAT-3. *Oncotarget*. 2015; 6: 11561-11574. doi: 10.18632/oncotarget.3427.
91. Pearson HB, Pheasant TJ, Clarke AR. K-ras and Wnt signaling synergize to accelerate prostate tumorigenesis in the mouse. *Cancer Res*. 2009; 69: 94-101.
92. Yu X, Wang Y, DeGraff DJ, Wills ML, Matusik RJ. Wnt/



- beta-catenin activation promotes prostate tumor progression in a mouse model. *Oncogene*. 2011; 30: 1868-1879.
93. Chien AJ, Moore EC, Lonsdorf AS, Kulikauskas RM, Rothberg BG, Berger AJ, Major MB, Hwang ST, Rimm DL, Moon RT. Activated Wnt/beta-catenin signaling in melanoma is associated with decreased proliferation in patient tumors and a murine melanoma model. *Pro Nat Acad Sci USA*. 2009; 106: 1193-1198.
  94. Liu L, Zhu XD, Wang WQ, Shen Y, Qin Y, Ren ZG, Sun HC, Tang ZY. Activation of beta-catenin by hypoxia in hepatocellular carcinoma contributes to enhanced metastatic potential and poor prognosis. *Clinical Cancer Res*. 2010; 16: 2740-2750.
  95. Yook JI, Li XY, Ota I, Hu C, Kim HS, Kim NH, Cha SY, Ryu JK, Choi YJ, Kim J, Fearon ER, Weiss SJ. A Wnt-Axin2-GSK3beta cascade regulates Snail1 activity in breast cancer cells. *Nat Cell Biol*. 2006; 8: 1398-1406.
  96. Hu-Lieskovan S, Homet Moreno B, Ribas A. Excluding T Cells: Is beta-Catenin the Full Story? *Cancer Cell*. 2015; 27: 749-750.
  97. Hiendlmeyer E, Regus S, Wassermann S, Hlubek F, Haynl A, Dimmler A, Koch C, Knoll C, van Beest M, Reuning U, Brabletz T, Kirchner T, Jung A. Beta-catenin up-regulates the expression of the urokinase plasminogen activator in human colorectal tumors. *Cancer Res*. 2004; 64: 1209-1214.
  98. Malladi S, Macalinao DG, Jin X, He L, Basnet H, Zou Y, de Stanchina E, Massague J. Metastatic Latency and Immune Evasion through Autocrine Inhibition of WNT. *Cell*. 2016; 165: 45-60.
  99. Spranger S, Bao R, Gajewski TF. Melanoma-intrinsic beta-catenin signalling prevents anti-tumour immunity. *Nature*. 2015; 523: 231-235.
  100. Fu C, Jiang A.  $\beta$ -Catenin-mediated inhibition of cross-priming: A new mechanism for tumors to evade immunosurveillance. *Oncoimmunology*. 2013; 2: e26920.
  101. Tsukamoto AS, Grosschedl R, Guzman RC, Parslow T, Varmus HE. Expression of the int-1 gene in transgenic mice is associated with mammary gland hyperplasia and adenocarcinomas in male and female mice. *Cell*. 1988; 55: 619-625.
  102. Rosner A, Miyoshi K, Landesman-Bollag E, Xu X, Seldin DC, Moser AR, MacLeod CL, Shyamala G, Gillgrass AE, Cardiff RD. Pathway pathology: histological differences between ErbB/Ras and Wnt pathway transgenic mammary tumors. *Am J Pathol*. 2002; 161:1087-1097.
  103. Sebio A, Kahn M, Lenz HJ. The potential of targeting Wnt/beta-catenin in colon cancer. *Expert Opin Ther Targets*. 2014; 18: 611-615.
  104. Huang SM, Mishina YM, Liu S, Cheung A, Stegmeier F, Michaud GA, Charlat O, Wiellette E, Zhang Y, Wiessner S, Hild M, Shi X, Wilson CJ, et al. Tankyrase inhibition stabilizes axin and antagonizes Wnt signalling. *Nature*. 2009; 461: 614-620.
  105. Lau T, Chan E, Callow M, Waaler J, Boggs J, Blake RA, Magnuson S, Sambrone A, Schutten M, Firestein R, Machon O, Korinek V, Choo E, et al. A novel tankyrase small-molecule inhibitor suppresses APC mutation-driven colorectal tumor growth. *Cancer Res*. 2013; 73: 3132-3144.
  106. Waaler J, Machon O, Tumova L, Dinh H, Korinek V, Wilson SR, Paulsen JE, Pedersen NM, Eide TJ, Machonova O, Gradl D, Voronkov A, von Kries JP, et al. A novel tankyrase inhibitor decreases canonical Wnt signaling in colon carcinoma cells and reduces tumor growth in conditional APC mutant mice. *Cancer Res*. 2012; 72: 2822-2832.
  107. Thorne CA, Hanson AJ, Schneider J, Tahinci E, Orton D, Cselenyi CS, Jernigan KK, Meyers KC, Hang BI, Waterson AG, Kim K, Melancon B, Ghidra VP, et al. Small-molecule inhibition of Wnt signaling through activation of casein kinase 1alpha. *Nat Chem Biol*. 2010; 6: 829-836.
  108. Labayle D, Fischer D, Vielh P, Drouhin F, Pariente A, Bories C, Duhamel O, Troussset M, Attali P. Sulindac causes regression of rectal polyps in familial adenomatous polyposis. *Gastroenterology*. 1991; 101: 635-639.
  109. Goessling W, North TE, Loewer S, Lord AM, Lee S, Stoick-Cooper CL, Weidinger G, Puder M, Daley GQ, Moon RT, Zon LI. Genetic interaction of PGE2 and Wnt signaling regulates developmental specification of stem cells and regeneration. *Cell*. 2009; 136: 1136-1147.
  110. Tuyenman JB, Vermeulen L, Boon EM, Kemper K, Zwiderman AH, Peppelenbosch MP, Richel DJ. Cyclooxygenase-2 inhibition inhibits c-Met kinase activity and Wnt activity in colon cancer. *Cancer Res*. 2008; 68: 1213-1220.
  111. Su Y, Simmen RC. Soy isoflavone genistein upregulates epithelial adhesion molecule E-cadherin expression and attenuates beta-catenin signaling in mammary epithelial cells. *Carcinogenesis*. 2009; 30: 331-339.
  112. Takahashi-Yanaga F, Taba Y, Miwa Y, Kubohara Y, Watanabe Y, Hirata M, Morimoto S, Sasaguri T. Dictyostelium differentiation-inducing factor-3 activates glycogen synthase kinase-3beta and degrades cyclin D1 in mammalian cells. *J Biol Chem*. 2003; 278: 9663-9670.
  113. Yokoya F, Imamoto N, Tachibana T, Yoneda Y.  $\beta$ -Catenin can be transported into the nucleus in a Ran-unassisted manner. *Mol Biol Cell*. 1999; 10: 1119-1131.
  114. Takada K, Zhu D, Bird GH, Sukhdeo K, Zhao JJ, Mani M, Lemieux M, Carrasco DE, Ryan J, Horst D, Fulciniti M, Munshi NC, Xu W, et al. Targeted disruption of the BCL9/beta-catenin complex inhibits oncogenic Wnt signaling. *Sci Transl Med*. 2012; 4: 148ra117.
  115. Catrow JL, Zhang Y, Zhang M, Ji H. Discovery of Selective Small-Molecule Inhibitors for the beta-Catenin/T-Cell Factor Protein-Protein Interaction through the Optimization of the Acyl Hydrazone Moiety. *J Med Chem*. 2015; 58: 4678-4692.
  116. Grossmann TN, Yeh JT, Bowman BR, Chu Q, Moellering RE, Verdine GL. Inhibition of oncogenic Wnt signaling

- through direct targeting of beta-catenin. *Proc Natl Acad Sci USA*. 2012; 109: 17942-17947.
117. Bass AJ, Lawrence MS, Brace LE, Ramos AH, Drier Y, Cibulskis K, Sougnez C, Voet D, Saksena G, Sivachenko A, Jing R, Parkin M, Pugh T, et al. Genomic sequencing of colorectal adenocarcinomas identifies a recurrent VTI1A-TCF7L2 fusion. *Nat Genet*. 2011; 43: 964-968.
118. Palmer HG, Gonzalez-Sancho JM, Espada J, Berciano MT, Puig I, Baulida J, Quintanilla M, Cano A, de Herreros AG, Lafarga M, Munoz A. Vitamin D(3) promotes the differentiation of colon carcinoma cells by the induction of E-cadherin and the inhibition of beta-catenin signaling. *J Cell Biol*. 2001; 154: 369-387.
119. Xiao JH, Ghosn C, Hinchman C, Forbes C, Wang J, Snider N, Cordrey A, Zhao Y, Chandraratna RA. Adenomatous polyposis coli (APC)-independent regulation of beta-catenin degradation via a retinoid X receptor-mediated pathway. *J Biol Chem*. 2003; 278: 29954-29962.
120. Emami KH, Nguyen C, Ma H, Kim DH, Jeong KW, Eguchi M, Moon RT, Teo JL, Kim HY, Moon SH, Ha JR, Kahn M. A small molecule inhibitor of beta-catenin/CREB-binding protein transcription [corrected]. *Proc Natl Acad Sci USA*. 2004; 101: 12682-12687.
121. Deka J, Wiedemann N, Anderle P, Murphy-Seiler F, Bultinck J, Eyckerman S, Stehle JC, Andre S, Vilain N, Zilian O, Robine S, Delorenzi M, Basler K, et al. Bcl9/Bcl9l are critical for Wnt-mediated regulation of stem cell traits in colon epithelium and adenocarcinomas. *Cancer Res*. 2010; 70: 6619-6628.
122. Chen B, Dodge ME, Tang W, Lu J, Ma Z, Fan CW, Wei S, Hao W, Kilgore J, Williams NS, Roth MG, Amatruda JF, Chen C, et al. Small molecule-mediated disruption of Wnt-dependent signaling in tissue regeneration and cancer. *Nat Chem Biol*. 2009; 5: 100-107.
123. Gong A, Huang S. FoxM1 and Wnt/ $\beta$ -catenin signaling in glioma stem cells. *Cancer Res*. 2012; 72: 5658-62.
124. Liu J, Pan S, Hsieh MH, Ng N, Sun F, Wang T, Kasibhatla S, Schuller AG, Li AG, Cheng D, Li J, Tompkins C, Pferdekamper, et al. Targeting Wnt-driven cancer through the inhibition of Porcupine by LGK974. *Proc Natl Acad Sci U S A*. 2013 ;110: 20224-9.
